# Supplementary material for: Effectiveness and Cost-Effectiveness of Case Management in Advanced Heart Failure Patients Attended in Primary Care: A Systematic Review and Meta-Analysis
Source: MDPI journal article supplement (doi:10.3390/ijerph192113823), 2022-10-24
Supplement: s1 [file s1]

**Table S1. Excluded articles at full text level**

| <b>Title</b>                                                                                                                                                                                            | <b>Year</b> | <b>Journal</b>        | <b>Volume</b> | <b>Issue</b> | <b>Pages</b> | <b>Authors</b>        | <b>Exclusion Reasons</b> |
|---------------------------------------------------------------------------------------------------------------------------------------------------------------------------------------------------------|-------------|-----------------------|---------------|--------------|--------------|-----------------------|--------------------------|
| Risk score-guided multidisciplinary team-based Care for Heart Failure Inpatients is associated with lower 30-day readmission and lower 30-day mortality                                                 | 2019        | Am Heart J            | 219           |              | 78-88        | Horne,B.D et al       | wrong population         |
| Nurse-Led Collaborative Management Using Telemonitoring Improves Quality of Life and Prevention of Rehospitalization in Patients with Heart Failure                                                     | 2019        | Int Heart J           | 60            | 6            | 1293-1302    | Mizukawa,M et al      | wrong population         |
| Implementation and Impact of Home-Based Cardiac Rehabilitation in a Veterans Affairs Medical Center                                                                                                     | 2019        | Mil Med               | 185           | 44352        | e859-e863    | Prasada,S et al       | wrong population         |
| Implementation of a Shared Medical Appointment as a Holistic Approach to CHF Management                                                                                                                 | 2019        | Holist Nurs Pract     | 33            | 6            | 354-359      | Law,T et al           | wrong population         |
| The development and pilot study of a nurse-led HOME-based HEart failure self-Management Programme (the HOM-HEMP) for patients with chronic heart failure, following Medical Research Council guidelines | 2019        | Eur J Cardiovasc Nurs | 19            | 3            | 212-222      | Jiang,Y et al         | wrong population         |
| Value of information analysis in telehealth for chronic heart failure management                                                                                                                        | 2019        | PLoS One              | 14            | 6            | e0218083     | Grustam,A.S et al     | wrong population         |
| Coordinated-Transitional Care for Veterans with Heart Failure and Chronic Lung Disease                                                                                                                  | 2019        | J Am Geriatr Soc      | 67            | 7            | 1502-1507    | Reese,R.L et al       | wrong population         |
| Implementation of an intensified outpatient follow-up protocol improves outcomes in patients with ventricular assist devices                                                                            | 2019        | Clin Res Cardiol      | 108           | 11           | 1197-1207    | Hamed,S et al         | wrong intervention       |
| Effect of Patient-Centered Transitional Care Services on Clinical Outcomes in Patients Hospitalized for Heart Failure: The PACT-HF Randomized Clinical Trial                                            | 2019        | JAMA                  | 321           | 8            | 753-761      | Van Spall,H.G.C et al | wrong population         |

|                                                                                                                                                                                                                                                     |      |                                      |     |    |          |                        |                    |
|-----------------------------------------------------------------------------------------------------------------------------------------------------------------------------------------------------------------------------------------------------|------|--------------------------------------|-----|----|----------|------------------------|--------------------|
| Implications of Transitional Care Interventions on Hospital Readmissions in Patients With Destination Therapy Left Ventricular Assist Devices                                                                                                       | 2019 | Res Theory Nurs Pract                | 33  | 1  | 81-96    | Iseler,J.I et al       | not found          |
| Influence of Risk on Reduction of Readmission and Death by Disease Management Programs in Heart Failure                                                                                                                                             | 2019 | J Card Fail                          | 25  | 5  | 330-339  | Huynh,Q.L et al        | wrong population   |
| Disease management interventions for heart failure                                                                                                                                                                                                  | 2019 | Cochrane Database Syst Rev           | 1   | 1  | CD002752 | Takeda,A et al         | systematic review  |
| Effectiveness of a community care management program for multimorbid elderly patients with heart failure in the Veneto Region                                                                                                                       | 2019 | Aging Clin Exp Res                   | 31  | 2  | 241-247  | Tiozzo,S.N et al       | wrong population   |
| Effectiveness of the European Society of Cardiology/Heart Failure Association website 'heartfailurematters.org' and an e-health adjusted care pathway in patients with stable heart failure: results of the 'e-Vita HF' randomized controlled trial | 2019 | Eur J Heart Fail                     | 21  | 2  | 238-246  | Wagenaar,K.P et al     | wrong population   |
| Destination Therapy: Standardizing the Role of Palliative Medicine and Delineating the DT-LVAD Journey                                                                                                                                              | 2019 | J Pain Symptom Manage                | 57  | 2  | 330-340  | Woodburn,J.L et al     | wrong intervention |
| A complex intervention of self-management for patients with COPD or CHF in primary care improved performance and satisfaction with regard to own selected activities; A longitudinal follow-up                                                      | 2019 | J Adv Nurs                           | 75  | 1  | 175-186  | Zakrisson,A.B et al    | wrong population   |
| Introducing nurse-led heart failure clinics in Swedish primary care settings                                                                                                                                                                        | 2019 | Eur J Heart Fail                     | 21  | 1  | 103-109  | Liljeroos,M et al      | wrong population   |
| Evaluation of a nurse-led intervention program in heart failure: A randomized trial                                                                                                                                                                 | 2019 | Med Clin (Barc)                      | 152 | 11 | 431-437  | Ortiz-Bautista,C et al | wrong population   |
| The Effect of a Telephone-Based Self-management Program Led by Nurses on Self-care Behavior, Biological Index for Cardiac Function, and Depression in Ambulatory Heart Failure Patients                                                             | 2018 | Asian Nurs Res (Korean Soc Nurs Sci) | 12  | 4  | 251-257  | Moon,M.K et al         | wrong population   |

|                                                                                                                                                                                                                                                                      |      |                          |    |     |          |                         |                   |
|----------------------------------------------------------------------------------------------------------------------------------------------------------------------------------------------------------------------------------------------------------------------|------|--------------------------|----|-----|----------|-------------------------|-------------------|
| Impact of telemedicine on the clinical outcomes and healthcare costs of patients with chronic heart failure and mid-range or preserved ejection fraction managed in a multidisciplinary chronic heart failure programme: A sub-analysis of the iCOR randomized trial | 2020 | J Telemed Telecare       | 24 | 1_2 | 65-72    | Jimenez-Marrero,S et al | wrong population  |
| Effects of a person-centred telephone-support in patients with chronic obstructive pulmonary disease and/or chronic heart failure - A randomized controlled trial                                                                                                    | 2018 | PLoS One                 | 13 | 8   | e0203031 | Fors,A et al            | wrong population  |
| Achieving IHI's Triple Aim by Utilizing Core Health Program With Community Health Workers in Rural Communities                                                                                                                                                       | 2018 | Fam Community Health     | 41 | 4   | 255-264  | Fawcett,K.J.,Jr et al   | wrong population  |
| Effects of a multidisciplinary disease management programme with or without exercise training for heart failure patients: Secondary analysis of a randomized controlled trial                                                                                        | 2018 | Int J Nurs Stud          | 87 |     | 94-102   | Liu,M.H et al           | wrong population  |
| Impact of the Implementation of Project Re-Engineered Discharge for Heart Failure patients at a Veterans Affairs Hospital at the Central Arkansas Veterans Healthcare System                                                                                         | 2018 | Hosp Pharm               | 53 | 4   | 266-271  | Patel,P.H et al         | wrong population  |
| Heart Failure Management in Nursing Homes: A Scoping Literature Review                                                                                                                                                                                               | 2018 | Can J Cardiol            | 34 | 7   | 871-880  | Heckman,G.A et al       | systematic review |
| A review of integrated heart failure care                                                                                                                                                                                                                            | 2018 | Prim Health Care Res Dev | 20 |     | e57      | MacInnes,J et al        | systematic review |
| Opposite trends in hospitalization and mortality after implementation of a chronic care model-based regional program for the management of patients with heart failure in primary care                                                                               | 2018 | BMC Health Serv Res      | 18 | 1   | 388      | Ballo,P et al           | wrong population  |
| Effectiveness of a transition plan at discharge of patients hospitalized with heart failure: a before-and-after study                                                                                                                                                | 2018 | ESC Heart Fail           | 5  | 4   | 657-667  | Garnier,A et al         | wrong population  |

|                                                                                                                                                                                           |      |                         |     |    |           |                      |                   |
|-------------------------------------------------------------------------------------------------------------------------------------------------------------------------------------------|------|-------------------------|-----|----|-----------|----------------------|-------------------|
| Cost-Effectiveness of a Home Visit Program for Patients with Heart Failure in Brazil: Evidence from a Randomized Clinical Trial                                                           | 2018 | Value Health Reg Issues | 17  |    | 81-87     | Ruschel,K.B et al    | wrong population  |
| Effect of Grand-Aides Nurse Extenders on Readmissions and Emergency Department Visits in Medicare Patients With Heart Failure                                                             | 2018 | Am J Cardiol            | 121 | 11 | 1336-1342 | Thomas,S.C et al     | wrong population  |
| Performance Improvement to Decrease Readmission Rates for Patients With a Left Ventricular Assist Device                                                                                  | 2018 | Prog Transplant         | 28  | 2  | 184-188   | Iseler,J et al       | wrong population  |
| [Efficacy of a multidisciplinary care management program for patients admitted at hospital because of heart failure (ProMIC)]                                                             | 2019 | Aten Primaria           | 51  | 3  | 142-152   | Domingo,C et al      | wrong population  |
| Effect of a Collaborative Care Intervention vs Usual Care on Health Status of Patients With Chronic Heart Failure: The CASA Randomized Clinical Trial                                     | 2018 | JAMA Intern Med         | 178 | 4  | 511-519   | Bekelman,D.B et al   | wrong population  |
| The first multicenter, randomized, controlled trial of home telemonitoring for Japanese patients with heart failure: home telemonitoring study for patients with heart failure (HOMES-HF) | 2018 | Heart Vessels           | 33  | 8  | 866-876   | Kotooka,N et al      | wrong population  |
| Videoconferencing for Management of Heart Failure: An Integrative Review                                                                                                                  | 2018 | J Gerontol Nurs         | 44  | 4  | 45-52     | Bauce,K et al        | systematic review |
| Pilot testing of the effectiveness of nurse-guided, patient-centered heart failure education for older adults                                                                             | 2018 | Geriatr Nurs            | 39  | 4  | 376-381   | Mathew,S et al       | wrong population  |
| The effect of nurse-led education on hospitalisation, readmission, quality of life and cost in adults with heart failure. A systematic review                                             | 2018 | Patient Educ Couns      | 101 | 3  | 363-374   | Rice,H et al         | systematic review |
| Home-based telerehabilitation in older patients with chronic obstructive pulmonary disease and heart failure: a randomised controlled trial                                               | 2018 | Age Ageing              | 47  | 1  | 82-88     | Bernocchi,P et al    | wrong population  |
| Palliative Care in Heart Failure: Rationale, Evidence, and Future Priorities                                                                                                              | 2017 | J Am Coll Cardiol       | 70  | 15 | 1919-1930 | Kavalieratos,D et al | systematic review |

|                                                                                                                                                                             |      |                               |    |    |                  |                          |                   |
|-----------------------------------------------------------------------------------------------------------------------------------------------------------------------------|------|-------------------------------|----|----|------------------|--------------------------|-------------------|
| Telemanagement of Heart Failure Patients Across the Post-Acute Care Continuum                                                                                               | 2018 | Telemed J E Health            | 24 | 5  | 360-366          | Dadosky,A et al          | wrong population  |
| Processes and Outcomes of Congestive Heart Failure Care by Different Types of Primary Care Models                                                                           | 2018 | J Card Fail                   | 24 | 1  | 9-18             | Kuo,Y.F et al            | wrong population  |
| An evaluation of involving family caregivers in the self-care of heart failure patients on hospital readmission: Randomised controlled trial (the FAMILY study)             | 2017 | Int J Nurs Stud               | 75 |    | 101-111          | Deek,H et al             | wrong population  |
| Implementation of a Patient Navigator Program to Reduce 30-day Heart Failure Readmission Rate                                                                               | 2017 | Prog Cardiovasc Dis           | 60 | 2  | 259-266          | Di Palo,K.E et al        | wrong population  |
| Effect of Early Follow-Up After Hospital Discharge on Outcomes in Patients With Heart Failure or Chronic Obstructive Pulmonary Disease: A Systematic Review                 | 2017 | Ont Health Technol Assess Ser | 17 | 8  | 1-37             | Song, J et al            | wrong population  |
| Impact of a Multidisciplinary Heart Failure Postdischarge Management Clinic on Medication Adherence                                                                         | 2017 | Clin Ther                     | 39 | 6  | 1200-1209        | Lu, L et al              | wrong population  |
| Standard vs. intensified management of heart failure to reduce healthcare costs: results of a multicentre, randomized controlled trial                                      | 2017 | Eur Heart J                   | 38 | 30 | 2340-2348        | Scuffham,P.A et al       | wrong population  |
| Disease management in the treatment of patients with chronic heart failure who have universal access to health care: a randomized controlled trial                          | 2017 | BMC Med                       | 15 | 1  | 90               | Kalter-Leibovici,O et al | wrong population  |
| [The APULIA HF multicenter study: efficacy of a management protocol shared between hospital and territorial health services for acute decompensated heart failure patients] | 2017 | G Ital Cardiol (Rome)         | 18 | 2  | 150-158          | Iacoviello,M et al       | wrong population  |
| Transitional care interventions: Relevance for nursing in the community                                                                                                     | 2017 | Public Health Nurs            | 34 | 5  | 454-460          | Coffey,A et al           | wrong population  |
| The effectiveness of telemedicine in the management of chronic heart disease - a systematic review                                                                          | 2017 | JRSM Open                     | 8  | 3  | 2054270416681747 | Kruse,C.S et al          | systematic review |

|                                                                                                                                                                    |      |                             |    |    |           |                          |                    |
|--------------------------------------------------------------------------------------------------------------------------------------------------------------------|------|-----------------------------|----|----|-----------|--------------------------|--------------------|
| Comparative effectiveness of transitional care services in patients discharged from the hospital with heart failure: a systematic review and network meta-analysis | 2017 | Eur J Heart Fail            | 19 | 11 | 1427-1443 | Van Spall,H.G.C et al    | systematic review  |
| Cost-effectiveness analysis for a tele-based health coaching program for chronic disease in primary care                                                           | 2017 | BMC Health Serv Res         | 17 | 1  | 138       | Oksman,E et al           | wrong population   |
| Remote Monitoring of Patients With Heart Failure: An Overview of Systematic Reviews                                                                                | 2017 | J Med Internet Res          | 19 | 1  | e18       | Bashi,N et al            | systematic review  |
| [Development and Effects of a Heart Health Diary for Self-Care Enhancement of Patients with Heart Failure]                                                         | 2016 | J Korean Acad Nurs          | 46 | 6  | 881-893   | Shim,J.L et al           | wrong intervention |
| Improving quality of life and decreasing readmissions in heart failure patients in a multidisciplinary transition-to-care clinic                                   | 2017 | Heart Lung                  | 46 | 2  | 79-84     | Whitaker-Brown,C.D et al | wrong population   |
| A Retrospective Comparison of Home Telehealth and Nursing Care With or Without Rehabilitation Therapy on Rehospitalization Rates of Individuals With Heart Failure | 2017 | J Cardiopulm Rehabil Prev   | 37 | 3  | 207-213   | Martin,S et al           | wrong population   |
| What is the impact of systems of care for heart failure on patients diagnosed with heart failure: a systematic review                                              | 2016 | BMC Cardiovasc Disord       | 16 | 1  | 195       | Driscoll,A et al         | systematic review  |
| The Intensity of Primary Care for Heart Failure Patients: A Determinant of Readmissions? The CarPaths Study: A French Region-Wide Analysis                         | 2016 | PLoS One                    | 11 | 10 | e0163268  | Duflos,C.M et al         | wrong population   |
| [Reduction of rehospitalisation on elderly heart failure patients: A retrospective cohort VISage network]                                                          | 2016 | Ann Cardiol Angeiol (Paris) | 65 | 5  | 293-298   | Labranche,D et al        | wrong population   |
| Feasibility study of a nurse-led heart failure education program                                                                                                   | 2016 | Contemp Nurse               | 52 | 4  | 499-510   | Baptiste,D.L et al       | wrong population   |
| Reducing Readmissions among Heart Failure Patients Discharged to Home Health Care:                                                                                 | 2017 | Health Serv Res             | 52 | 4  | 1445-1472 | Murtaugh,C.M et al       | wrong population   |

|                                                                                                                                                         |      |                          |     |    |           |                   |                    |
|---------------------------------------------------------------------------------------------------------------------------------------------------------|------|--------------------------|-----|----|-----------|-------------------|--------------------|
| Effectiveness of Early and Intensive Nursing Services and Early Physician Follow-Up                                                                     |      |                          |     |    |           |                   |                    |
| The E-Coach technology-assisted care transition system: a pragmatic randomized trial                                                                    | 2016 | Transl Behav Med         | 6   | 3  | 428-437   | Ritchie,C.S et al | wrong population   |
| A High-Touch Model of Community-Based Specialist Palliative Care: Latent Class Analysis Identifies Distinct Patient Subgroups                           | 2016 | J Pain Symptom Manage    | 52  | 2  | 178-186   | Dhingra,L et al   | wrong study design |
| Does case management for patients with heart failure based in the community reduce unplanned hospital admissions? A systematic review and meta-analysis | 2016 | BMJ Open                 | 6   | 5  | e010933   | Huntley,A.L et al | systematic review  |
| Health-Related Quality of Life in Heart Failure Patients With Varying Levels of Health Literacy Receiving Telemedicine and Standardized Education       | 2016 | Home Healthc Now         | 34  | 5  | 267-272   | Yehle,K.S et al   | wrong population   |
| Evaluation of the efficacy of a nurse practitioner-led home-based congestive heart failure clinical pathway                                             | 2016 | Home Health Care Serv    | 35  | 1  | 39-51     | Moore,J.A         | wrong population   |
| Effects of a transitional palliative care model on patients with end-stage heart failure: a randomised controlled trial                                 | 2016 | Heart                    | 102 | 14 | 1100-1108 | Wong,F.K et al    | wrong population   |
| Evaluation of a Community Health Service Center-Based Intervention Program for Managing Chronic Heart Failure                                           | 2016 | Balkan Med J             | 33  | 1  | 45-51     | Gu,M et al        | wrong population   |
| Decreasing Congestive Heart Failure Readmission Rates Within 30 Days at the Tampa VA                                                                    | 2016 | Nurs Adm Q               | 40  | 2  | 146-152   | Messina,W         | wrong population   |
| How effective is an in-hospital heart failure self-care program in a Japanese setting? Lessons from a randomized controlled pilot study                 | 2016 | Patient Prefer Adherence | 10  |    | 171-181   | Kato,N.P et al    | wrong population   |
| Nurse Practitioner Care Model: Meeting the Health Care Challenges With a Collaborative Team                                                             | 2015 | Nurs Econ                | 33  | 6  | 297-304   | Kutzleb,J et al   | not found          |
| A systematic review of transitional-care strategies to reduce rehospitalization in patients with heart failure                                          | 2016 | Heart Lung               | 45  | 2  | 100-113   | Albert,N.M.       | systematic review  |

|                                                                                                                                                                                                                                                                                       |      |                            |     |    |           |                         |                   |
|---------------------------------------------------------------------------------------------------------------------------------------------------------------------------------------------------------------------------------------------------------------------------------------|------|----------------------------|-----|----|-----------|-------------------------|-------------------|
| Protocol-Driven Allied Health Post-Discharge Transition Clinic to Reduce Hospital Readmissions in Heart Failure                                                                                                                                                                       | 2015 | J Am Heart Assoc           | 4   | 12 |           | Donaho,E.K et al        | wrong population  |
| Impact of APN Home Visits in Reducing Healthcare Costs and Improving Function in Homebound Heart Failure                                                                                                                                                                              | 2015 | Home Healthc Now           | 33  | 10 | 532-537   | Echeverry,L.M et al     | wrong population  |
| Effectiveness of an interactive platform, and the ESC/HFA heartfailurematters.org website in patients with heart failure: design of the multicentre randomized e-Vita heart failure trial                                                                                             | 2015 | Eur J Heart Fail           | 17  | 12 | 1310-1316 | Wagenaar,K.P et al      | wrong population  |
| Combining training in knowledge translation with quality improvement reduced 30-day heart failure readmissions in a community hospital: a case study                                                                                                                                  | 2016 | J Eval Clin Pract          | 22  | 2  | 171-179   | Wyer,P et al            | wrong population  |
| Interactive telemedicine: effects on professional practice and health care outcomes                                                                                                                                                                                                   | 2015 | Cochrane Database Syst Rev |     | 9  | CD002098  | Flodgren,G et al        | systematic review |
| Evaluation of telehealth service for patients with congestive heart failure in the north of Israel                                                                                                                                                                                    | 2016 | Eur J Cardiovasc Nurs      | 15  | 3  | e78-e84   | Eilat-Tsanani,S et al   | wrong population  |
| Cost-effectiveness of home versus clinic-based management of chronic heart failure: Extended follow-up of a pragmatic, multicentre randomized trial cohort - The WHICH? study (Which Heart Failure Intervention Is Most Cost-Effective & Consumer Friendly in Reducing Hospital Care) | 2015 | Int J Cardiol              | 201 |    | 368-375   | Maru,S et al            | wrong population  |
| Effect of Nurse-Implemented Transitional Care for Chinese Individuals with Chronic Heart Failure in Hong Kong: A Randomized Controlled Trial                                                                                                                                          | 2015 | J Am Geriatr Soc           | 63  | 8  | 1583-1593 | Yu,D.S et al            | wrong population  |
| Impact of a Multidisciplinary Heart Failure Post-hospitalization Program on Heart Failure Readmission Rates                                                                                                                                                                           | 2015 | Ann Pharmacother           | 49  | 11 | 1189-1196 | Jackevicius,C.A et al   | wrong population  |
| The clinical effectiveness and cost-effectiveness of clinical nurse specialist-led hospital to home transitional care: a systematic review                                                                                                                                            | 2015 | J Eval Clin Pract          | 21  | 5  | 763-781   | Bryant-Lukosius,D et al | systematic review |



|                                                                                                                                                          |      |                    |     |   |           |                       |                   |
|----------------------------------------------------------------------------------------------------------------------------------------------------------|------|--------------------|-----|---|-----------|-----------------------|-------------------|
| Outcome of Patients Discharged From a Heart Failure Disease Management Program following Their Clinical and Echocardiographic Recovery                   | 2015 | Cardiology         | 131 | 3 | 197-202   | Proctor,P et al       | wrong population  |
| Heart failure remote monitoring: evidence from the retrospective evaluation of a real-world remote monitoring program                                    | 2015 | J Med Internet Res | 17  | 4 | e101      | Agboola,S et al       | wrong population  |
| Seamless Transitions: Achieving Patient Safety Through Communication and Collaboration                                                                   | 2018 | J Patient Saf      | 14  | 1 | e3-e5     | Radhakrishnan,K et al | wrong population  |
| Nurse-Led Multidisciplinary Heart Failure Group Clinic Appointments: Methods, Materials, and Outcomes Used in the Clinical Trial                         | 2015 | J Cardiovasc Nurs  | 30  | 4 | S25-S34   | Smith,C.E et al       | wrong population  |
| Telecare for diabetes, CHF or COPD: effect on quality of life, hospital use and costs. A randomised controlled trial and qualitative evaluation          | 2015 | PLoS One           | 10  | 3 | e0116188  | Kenealy,T.W et al     | wrong population  |
| If home telemonitoring reduces mortality in heart failure, is this just due to better guideline-based treatment?                                         | 2015 | J Telemed Telecare | 21  | 6 | 331-339   | Dierckx,R et al       | wrong population  |
| Care in the Home for the Management of Chronic Heart Failure: Systematic Review and Cost-Effectiveness Analysis                                          | 2015 | J Cardiovasc Nurs  | 30  | 4 | S44-S51   | Fergenbaum,J et al    | systematic review |
| Home telehealth and hospital readmissions: a retrospective OASIS-C data analysis                                                                         | 2015 | Home Healthc Now   | 33  | 1 | 20-26     | Thomason,T.R et al    | wrong population  |
| A heart failure initiative to reduce the length of stay and readmission rates                                                                            | 2014 | Prof Case Manag    | 19  | 6 | 276-284   | White,S.M et al       | wrong population  |
| Resource use and cost implications of implementing a heart failure program for patients with systolic heart failure in Swedish primary health care       | 2014 | Int J Cardiol      | 176 | 3 | 731-738   | Agvall,B et al        | wrong population  |
| A nurse-based strategy reduces heart failure morbidity in patients admitted for acute decompensated heart failure in Brazil: the HELEN-II clinical trial | 2014 | Eur J Heart Fail   | 16  | 9 | 1002-1008 | de Souza,E.N et al    | wrong population  |

|                                                                                                                                                                                                                                  |      |                           |     |    |           |                        |                   |
|----------------------------------------------------------------------------------------------------------------------------------------------------------------------------------------------------------------------------------|------|---------------------------|-----|----|-----------|------------------------|-------------------|
| [Early implementation of home care and 30 day readmissions in >65 years Veneto region patients discharged for heart failure and with disability]                                                                                 | 2014 | Assist Infirm Ric         | 33  | 2  | 67-73     | Gennaro,N et al        | not found         |
| Transitional care interventions to prevent readmissions for persons with heart failure: a systematic review and meta-analysis                                                                                                    | 2014 | Ann Intern Med            | 160 | 11 | 774-784   | Feltner,C et al        | systematic review |
| Efficacy of an integrated hospital-primary care program for heart failure: a population-based analysis of 56,742 patients                                                                                                        | 2014 | Rev Esp Cardiol (Engl Ed) | 67  | 4  | 283-293   | Comin-Colet,J et al    | wrong population  |
| The effect of a randomized trial of home telemonitoring on medical costs, 30-day readmissions, mortality, and health-related quality of life in a cohort of community-dwelling heart failure patients                            | 2014 | J Card Fail               | 20  | 7  | 513-521   | Blum,K et al           | wrong population  |
| The comparison of the effects of education provided by nurses on the quality of life in patients with congestive heart failure (CHF) in usual and home-visit cares in Iran                                                       | 2014 | Glob J Health Sci         | 6   | 3  | 256-260   | Mehralian,H et al      | wrong population  |
| Integrated telehealth care for chronic illness and depression in geriatric home care patients: the Integrated Telehealth Education and Activation of Mood (I-TEAM) study                                                         | 2014 | J Am Geriatr Soc          | 62  | 5  | 889-895   | Gellis,Z.D et al       | wrong population  |
| Cost-effectiveness of a nurse facilitated, cognitive behavioural self-management programme compared with usual care using a CBT manual alone for patients with heart failure: secondary analysis of data from the SEMAPHOR trial | 2014 | Int J Nurs Stud           | 51  | 9  | 1214-1220 | Mejia,A et al          | wrong population  |
| The effect of multidisciplinary heart failure clinic characteristics on 1-year postdischarge health care costs: a population-based study                                                                                         | 2014 | Med Care                  | 52  | 3  | 272-279   | Wijeysundera,H.C et al | wrong population  |

|                                                                                                                                                                                    |      |                                  |    |    |           |                        |                   |
|------------------------------------------------------------------------------------------------------------------------------------------------------------------------------------|------|----------------------------------|----|----|-----------|------------------------|-------------------|
| Nurse facilitated Self-management support for people with heart failure and their family carers (SEMAPHFOR): a randomised controlled trial                                         | 2014 | Int J Nurs Stud                  | 51 | 9  | 1207-1213 | Cockayne,S et al       | wrong population  |
| Examining the effects of remote monitoring systems on activation, self-care, and quality of life in older patients with chronic heart failure                                      | 2015 | J Cardiovasc Nurs                | 30 | 1  | 51-57     | Evangelista,L.S et al  | wrong population  |
| Feasibility and acceptability of a collaborative care intervention to improve symptoms and quality of life in chronic heart failure: mixed methods pilot trial                     | 2014 | J Palliat Med                    | 17 | 2  | 145-151   | Bekelman,D.B et al     | wrong population  |
| Home-based telesurveillance program in chronic heart failure: effects on clinical status and implications for 1-year prognosis                                                     | 2013 | Telemed J E Health               | 19 | 8  | 605-612   | Giordano,A et al       | wrong population  |
| The effect of telemonitoring at home on quality of life and self-care behaviors of patients with heart failure                                                                     | 2013 | Home Healthc Nurse               | 31 | 7  | 368-377   | Hoban,M.B et al        | wrong population  |
| Impact of telemonitoring home care patients with heart failure or chronic lung disease from primary care on healthcare resource use (the TELBIL study randomised controlled trial) | 2013 | BMC Health Serv Res              | 13 |    | 118       | Martin-Lesende,I et al | wrong population  |
| Transitional care programs improve outcomes for heart failure patients: an integrative review                                                                                      | 2014 | J Cardiovasc Nurs                | 29 | 2  | 140-154   | Stamp,K.D et al        | systematic review |
| Cost-utility analysis of nt-probnp-guided multidisciplinary care in chronic heart failure                                                                                          | 2013 | Int J Technol Assess Health Care | 29 | 1  | 3-11      | Moertl,D et al         | wrong population  |
| A population-based study to evaluate the effectiveness of multidisciplinary heart failure clinics and identify important service components                                        | 2013 | Circ Heart Fail                  | 6  | 1  | 68-75     | Wijeysundera,H.C et al | wrong population  |
| The benefits of using a heart failure management programme in Swedish primary healthcare                                                                                           | 2013 | Eur J Heart Fail                 | 15 | 2  | 228-236   | Agvall,B et al         | wrong population  |
| Telephone support to rural and remote patients with heart failure: the Chronic Heart Failure Assessment by Telephone (CHAT) study                                                  | 2013 | Cardiovasc Ther                  | 31 | 4  | 230-237   | Krum,H et al           | wrong population  |
| Impact of home versus clinic-based management of chronic heart failure: the WHICH? (Which Heart                                                                                    | 2012 | J Am Coll Cardiol                | 60 | 14 | 1239-1248 | Stewart,S et al        | wrong population  |

|                                                                                                                                                        |      |                               |    |    |          |                        |                    |
|--------------------------------------------------------------------------------------------------------------------------------------------------------|------|-------------------------------|----|----|----------|------------------------|--------------------|
| Failure Intervention Is Most Cost-Effective & Consumer Friendly in Reducing Hospital Care)<br>multicenter, randomized trial                            |      |                               |    |    |          |                        |                    |
| A critical review on telemonitoring in heart failure                                                                                                   | 2012 | Acta Cardiol                  | 67 | 4  | 439-444  | Gurne,O et al          | systematic review  |
| Clinical service organisation for heart failure                                                                                                        | 2012 | Cochrane Database<br>Syst Rev |    | 9  | CD002752 | Takeda,A et al         | systematic review  |
| Role of a multidisciplinary program in improving outcomes in cognitively impaired heart failure older patients                                         | 2012 | Monaldi Arch Chest<br>Dis     | 78 | 1  | 20-28    | Del,Sindaco D et<br>al | wrong intervention |
| A systematic review of economic evaluations of cardiac rehabilitation                                                                                  | 2012 | BMC Health Serv Res           | 12 |    | 243      | Wong,W.P et al         | systematic review  |
| Effect of a community-based nursing intervention on mortality in chronically ill older adults: a randomized controlled trial                           | 2012 | PLoS Med                      | 9  | 7  | e1001265 | Coburn,K.D et al       | wrong population   |
| The impact of remote patient monitoring (telehealth) upon Medicare beneficiaries with heart failure                                                    | 2012 | Telemed J E Health            | 18 | 2  | 101-108  | Pekmezaris,R et al     | wrong population   |
| Evaluation of a nurse practitioner disease management model for chronic heart failure: a multi-site implementation study                               | 2012 | Congest Heart Fail            | 18 | 1  | 64-71    | Lowery,J et al         | wrong population   |
| [CorBene: a new model for collaborative care of patients with congestive heart failure]                                                                | 2012 | Herz                          | 37 | 1  | 56-58    | Gysan,D.B et al        | systematic review  |
| [Home-based telemonitoring of simple vital signs to reduce hospitalization in heart failure patients: real-world data from a community-based hospital] | 2011 | G Ital Cardiol (Rome)         | 12 | 12 | 829-836  | Palmieri,V et al       | not found          |
| Effectiveness of an educational self-management program for outpatients with chronic heart failure                                                     | 2011 | Jpn J Nurs Sci                | 8  | 2  | 140-152  | Otsu,H et al           | wrong population   |
| Effectiveness of a self-care program in improving symptom distress and quality of life in congestive heart failure patients: a preliminary study       | 2011 | J Nurs Res                    | 19 | 4  | 257-266  | Wang,S.P et al         | wrong population   |
| Home-based telemanagement in chronic heart failure: an 8-year single-site experience                                                                   | 2011 | J Telemed Telecare            | 17 | 7  | 382-386  | Giordano,A et al       | wrong population   |

|                                                                                                                                                                                                                         |      |                     |      |    |           |                            |                        |
|-------------------------------------------------------------------------------------------------------------------------------------------------------------------------------------------------------------------------|------|---------------------|------|----|-----------|----------------------------|------------------------|
| Clinical outcome of patients with chronic heart failure followed in a specialized heart failure center                                                                                                                  | 2011 | Isr Med Assoc J     | 13   | 8  | 468-473   | Gotsman,I et al            | wrong population       |
| Automated home telephone self-monitoring reduces hospitalization in patients with advanced heart failure                                                                                                                | 2011 | J Telemed Telecare  | 17   | 6  | 298-302   | Kurtz,B et al              | wrong population       |
| Effectiveness and cost of a transitional care program for heart failure: a prospective study with concurrent controls                                                                                                   | 2011 | Arch Intern Med     | 171  | 14 | 1238-1243 | Stauffer,B.D et al         | wrong population       |
| Rationale and design of the Japanese heart failure outpatients disease management and cardiac evaluation (J-HOMECARE)                                                                                                   | 2011 | J Cardiol           | 58   | 2  | 165-172   | Tsuchihashi-Makaya,M et al | wrong publication type |
| Home monitoring cuts cardiac readmissions                                                                                                                                                                               | 2011 | Hosp Case Manag     | 19   | 5  | 76-77     | No authors listed          | not found              |
| Discharge to a skilled nursing facility and subsequent clinical outcomes among older patients hospitalized for heart failure                                                                                            | 2011 | Circ Heart Fail     | 4    | 3  | 293-300   | Allen,L.A et al            | wrong population       |
| Swiss Interdisciplinary Management Programme for Heart Failure (SWIM-HF): a randomised controlled trial study of an outpatient inter-professional management programme for heart failure patients in Switzerland        | 2011 | Swiss Med Wkly      | 141  |    | w13171    | Leventhal,M.E et al        | wrong population       |
| The impact of proactive chronic care management on hospital admissions in a German senior population                                                                                                                    | 2011 | Popul Health Manag  | 14   |    | S29-S33   | Hamar,B et al              | wrong population       |
| The effect of telehomecare on heart failure self care                                                                                                                                                                   | 2010 | AMIA Annu Symp Proc | 2010 |    | 71-75     | Bowles,K.H et al           | wrong population       |
| Education and telephone monitoring by nurses of patients with heart failure: randomized clinical trial                                                                                                                  | 2011 | Arq Bras Cardiol    | 96   | 3  | 233-239   | Domingues,F.B et al        | wrong population       |
| Health-related quality of life in a multicenter randomized controlled comparison of telephonic disease management and automated home monitoring in patients recently hospitalized with heart failure: SPAN-CHF II trial | 2011 | J Card Fail         | 17   | 2  | 151-157   | Konstam,V et al            | wrong population       |

|                                                                                                                                                                                                                    |      |                               |    |    |           |                        |                   |
|--------------------------------------------------------------------------------------------------------------------------------------------------------------------------------------------------------------------|------|-------------------------------|----|----|-----------|------------------------|-------------------|
| Economic impact of remote patient monitoring: an integrated economic model derived from a meta-analysis of randomized controlled trials in heart failure                                                           | 2011 | Eur J Heart Fail              | 13 | 4  | 450-459   | Klersy,C et al         | systematic review |
| Telehealth in adult patients with congestive heart failure in long term home health care: a systematic review                                                                                                      | 2011 | JB Libr Syst Rev              | 9  | 30 | 1271-1296 | Cherofsky,N et al      | systematic review |
| Evaluation of the transitional care model in chronic heart failure                                                                                                                                                 | 2010 | Br J Nurs                     | 19 | 22 | 1402-1407 | Williams,G et al       | wrong population  |
| Cost-effectiveness of specialized multidisciplinary heart failure clinics in Ontario, Canada                                                                                                                       | 2010 | Value Health                  | 13 | 8  | 915-921   | Wijeysundera,H.C et al | wrong population  |
| A randomized trial of telemonitoring heart failure patients                                                                                                                                                        | 2010 | J Healthc Manag               | 55 | 5  | 312-322   | Tompkins,C et al       | wrong population  |
| The impact of a nurse-led care programme on events and physical and psychosocial parameters in patients with heart failure with preserved ejection fraction: a randomized clinical trial in primary care in Russia | 2010 | Eur J Gen Pract               | 16 | 4  | 205-214   | Andryukhin,A et al     | wrong population  |
| Improved quality of life in Norwegian heart failure patients after follow-up in outpatient heart failure clinics: results from the Norwegian Heart Failure Registry                                                | 2010 | Eur J Heart Fail              | 12 | 11 | 1247-1252 | Hole,T et al           | wrong population  |
| Long-term implications of a single home-based educational intervention in patients with heart failure                                                                                                              | 2010 | Heart Lung                    | 39 | 6  | S14-S22   | Aguado,O et al         | wrong population  |
| Can a heart failure-specific cardiac rehabilitation program decrease hospitalizations and improve outcomes in high-risk patients?                                                                                  | 2010 | Eur J Cardiovasc Prev Rehabil | 17 | 4  | 393-402   | Davidson,P.M et al     | wrong population  |
| Nurse-led self-management group programme for patients with congestive heart failure: randomized controlled trial                                                                                                  | 2010 | J Adv Nurs                    | 66 | 7  | 1487-1499 | Smeulders,E.S et al    | wrong population  |
| Case management for patients with chronic systolic heart failure in primary care: the HICMan exploratory randomised controlled trial                                                                               | 2010 | Trials                        | 11 |    | 56        | Peters-Klimm,F et al   | wrong population  |

|                                                                                                                                                                                                     |      |                       |     |    |         |                      |                   |
|-----------------------------------------------------------------------------------------------------------------------------------------------------------------------------------------------------|------|-----------------------|-----|----|---------|----------------------|-------------------|
| Randomized trials of nursing interventions for secondary prevention in patients with coronary artery disease and heart failure: systematic review                                                   | 2010 | J Cardiovasc Nurs     | 25  | 3  | 207-220 | Allen,J.K et al      | systematic review |
| [Comparison between telephone and outpatient nursing management in patients with chronic heart failure in a large territorial area in Piedmont, Italy]                                              | 2010 | G Ital Cardiol (Rome) | 11  | 1  | 35-42   | Mainardi,L et al     | not found         |
| A multicenter randomized controlled evaluation of automated home monitoring and telephonic disease management in patients recently hospitalized for congestive heart failure: the SPAN-CHF II trial | 2010 | J Card Fail           | 16  | 4  | 285-292 | Weintraub,A et al    | wrong population  |
| Assessment of the clinical outcomes and cost-effectiveness of the management of systolic heart failure in Chinese patients using a home-based intervention                                          | 2010 | J Int Med Res         | 38  | 1  | 242-252 | Chen,Y.H et al       | wrong population  |
| Nurse-led interventions in heart failure care: patient and nurse perspectives                                                                                                                       | 2010 | Eur J Cardiovasc Nurs | 9   | 4  | 226-232 | Hoekstra,T et al     | wrong population  |
| Evidence-based nursing: the role of the advanced practice registered nurse in the management of heart failure patients in the outpatient setting                                                    | 2010 | Dimens Crit Care Nurs | 29  | 2  | 57-62   | Case,R et al         | systematic review |
| Efficacy of multidisciplinary outpatient management (MOM) program in long term heart failure care                                                                                                   | 2010 | South med J           | 103 | 2  | 131-137 | Jain,R et al         | wrong population  |
| Primary care-based multifaceted, interdisciplinary medical educational intervention for patients with systolic heart failure: lessons learned from a cluster randomised controlled trial            | 2009 | Trials                | 10  |    | 68      | Peters-Klimm,F et al | wrong population  |
| [Integrated care for patients with heart failure in Switzerland: a cost analysis]                                                                                                                   | 2009 | Praxis (Bern 1994)    | 98  | 15 | 809-815 | Eichler,K et al      | wrong population  |
| Improving outcomes for older adults with heart failure: a randomized trial using a theory-guided nursing intervention                                                                               | 2010 | J Nurs Care Qual      | 25  | 1  | 56-64   | Duffy,J.R et al      | wrong population  |
| Outcomes of a home telehealth intervention for patients with heart failure                                                                                                                          | 2009 | J Telemed Telecare    | 15  | 1  | 46-50   | Wakefield,B.J et al  | wrong population  |

|                                                                                                                                           |      |                               |     |    |           |                              |                   |
|-------------------------------------------------------------------------------------------------------------------------------------------|------|-------------------------------|-----|----|-----------|------------------------------|-------------------|
| Community-based care for the specialized management of heart failure: an evidence-based analysis                                          | 2009 | Ont Health Technol Assess Ser | 9   | 17 | 1-42      | Medical Advisory Secretariat | systematic review |
| Cost-effectiveness of nurse-led disease management for heart failure in an ethnically diverse urban community                             | 2008 | Ann Intern Med                | 149 | 8  | 540-548   | Hebert,P.L et al             | wrong population  |
| [Value of basic and intensive management of patients with heart failure; results of a randomised controlled clinical trial]               | 2008 | Ned Tijdschr Geneeskd         | 152 | 37 | 2016-2021 | Jaarsma,T et al              | not found         |
| Tele-guidance of chronic heart failure patients enhances knowledge about the disease. A multi-centre, randomised controlled study         | 2008 | Eur J Heart Fail              | 10  | 11 | 1136-1142 | Balk,A.H et al               | wrong population  |
| Impact of telehealth on clinical outcomes in patients with heart failure                                                                  | 2008 | Clin Nurs Res                 | 17  | 3  | 182-199   | Dansky,K.H et al             | wrong population  |
| Multidisciplinary management of elderly patients with chronic heart failure: five year outcome measures in death and survivor groups      | 2009 | Eur J Cardiovasc Nurs         | 8   | 1  | 34-39     | Austin,J et al               | wrong population  |
| Cost-effectiveness of a disease management programme for secondary prevention of coronary heart disease and heart failure in primary care | 2008 | Heart                         | 94  | 12 | 1601-1606 | Turner,D.A et al             | wrong population  |
| Survival and hospitalization in a nurse-led domiciliary intervention for elderly heart failure patients                                   | 2008 | J Cardiovasc Med (Hagerstown) | 9   | 5  | 470-475   | Rondinini,L et al            | wrong population  |
| Five-year follow-up findings from a randomized controlled trial of cardiac rehabilitation for heart failure                               | 2008 | Eur J Cardiovasc Prev Rehabil | 15  | 2  | 162-167   | Austin,J et al               | wrong population  |
| Cost-effective care a phone call away: a nurse-managed telephonic program for patients with chronic heart failure                         | 2008 | Nurs Econ                     | 26  | 1  | 41-44     | Slater,M.R et al             | not found         |
| Telemonitoring of heart failure patients and their caregivers: a pilot randomized controlled trial                                        | 2008 | Prog Cardiovasc Nurs          | 23  | 1  | 18-26     | Schwarz,K.A et al            | wrong population  |



|                                                                                                                                                                                                  |      |                       |     |   |         |                  |                    |
|--------------------------------------------------------------------------------------------------------------------------------------------------------------------------------------------------|------|-----------------------|-----|---|---------|------------------|--------------------|
| Lessons learned from a multidisciplinary heart failure clinic for older women: a randomised controlled trial                                                                                     | 2008 | Age Ageing            | 37  | 3 | 282-287 | Azad,N et al     | wrong population   |
| Effect of moderate or intensive disease management program on outcome in patients with heart failure: Coordinating Study Evaluating Outcomes of Advising and Counseling in Heart Failure (COACH) | 2008 | Arch Intern Med       | 168 | 3 | 316-324 | Jaarsma,T et al  | wrong population   |
| Multicenter randomised trial on home-based telemanagement to prevent hospital readmission of patients with chronic heart failure                                                                 | 2009 | Int J Cardiol         | 131 | 2 | 192-199 | Giordano,A et al | wrong population   |
| Use of telehealth by older adults to manage heart failure                                                                                                                                        | 2008 | Res Gerontol Nurs     | 1   | 1 | 25-32   | Dansky,K.H et al | not found          |
| A randomized controlled trial of a community nurse-supported hospital discharge programme in older patients with chronic heart failure                                                           | 2008 | J Clin Nurs           | 17  | 1 | 109-117 | Kwok,T et al     | wrong population   |
| Impact of the implementation of telemanagement on a disease management program in an elderly heart failure cohort                                                                                | 2007 | Prog Cardiovasc Nurs  | 22  | 4 | 196-200 | Gambetta,M et al | wrong population   |
| A systematic review of nurse-assisted case management to improve hospital discharge transition outcomes for the elderly                                                                          | 2007 | Prof Case Manag       | 12  | 6 | 330-336 | Chiu,W.K et al   | systematic review  |
| The use of supportive-educative and mutual goal-setting strategies to improve self-management for patients with heart failure                                                                    | 2007 | Home Healthc Nurse    | 25  | 8 | 502-510 | Kline,K.S et al  | wrong population   |
| Impact of a specialized outpatient heart failure follow-up program on hospitalization frequency and functional status of patients with advanced heart failure                                    | 2007 | Rev Port Cardiol      | 26  | 4 | 335-343 | Correia,J et al  | wrong intervention |
| [Heart failure: the importance of a disease management program]                                                                                                                                  | 2007 | G Ital Cardiol (Rome) | 8   | 6 | 353-358 | Fabbri,G et al   | not found          |
| A systematic review of the benefits of home telecare for frail elderly people and those with long-term conditions                                                                                | 2007 | J Telemed Telecare    | 13  | 4 | 172-179 | Barlow,J et al   | systematic review  |

|                                                                                                                                                                          |      |                                  |     |     |           |                         |                    |
|--------------------------------------------------------------------------------------------------------------------------------------------------------------------------|------|----------------------------------|-----|-----|-----------|-------------------------|--------------------|
| Efficacy of community-based multidisciplinary disease management of chronic heart failure                                                                                | 2007 | Singapore Med J                  | 48  | 6   | 528-531   | Omar,A.R et al          | wrong population   |
| Lack of long-term benefits of a 6-month heart failure disease management program                                                                                         | 2007 | J Card Fail                      | 13  | 4   | 287-293   | Nguyen,V et al          | wrong population   |
| Improved cost-effectiveness for management of chronic heart failure by combined home-based intervention with clinical nursing specialists                                | 2007 | J Formos Med Assoc               | 106 | 4   | 313-319   | Ho,Y.L et al            | wrong population   |
| Two-year outcome of a prospective, controlled study of a disease management programme for elderly patients with heart failure                                            | 2007 | J Cardiovasc Med (Hagerstown)    | 8   | 5   | 324-329   | Del,Sindaco D et al     | wrong population   |
| [New multidisciplinary heart failure care program (six-month preliminary observation)]                                                                                   | 2006 | Pol Merkur Lekarski              | 21  | 126 | 511-515   | Wierzchowiecki, M et al | not found          |
| Home-based palliative care study: site of death, and costs of medical care for patients with congestive heart failure, chronic obstructive pulmonary disease, and cancer | 2005 | J Soc Work End Life Palliat Care | 1   | 3   | 37-56     | Enguidanos,S.M et al    | wrong intervention |
| The effect of frontloading visits on patient outcomes                                                                                                                    | 2007 | Home Healthc Nurse               | 25  | 2   | 103-109   | Rogers,J et al          | wrong population   |
| Motivational interviewing to change quality of life for people with chronic heart failure: a randomised controlled trial                                                 | 2008 | Int J Nurs Stud                  | 45  | 4   | 489-500   | Brodie,D.A et al        | wrong population   |
| Applying research evidence to optimize telehomecare                                                                                                                      | 2007 | J Cardiovasc Nurs                | 22  | 1   | 5-15      | Bowles,K.H et al        | systematic review  |
| Extending the horizon in chronic heart failure: effects of multidisciplinary, home-based intervention relative to usual care                                             | 2006 | Circulation                      | 114 | 23  | 2466-2473 | Inglis,S.C. et al       | wrong population   |
| Advanced practice nurse strategies to improve outcomes and reduce cost in elders with heart failure                                                                      | 2006 | Dis Manag                        | 9   | 5   | 302-310   | McCauley,K.M et al      | systematic review  |
| Telephone follow-up of self-care behaviour after a single session education of patients with heart failure in primary health care                                        | 2007 | Eur J Cardiovasc Nurs            | 6   | 2   | 153-159   | Holst,M et al           | wrong population   |
| Effects of nurse management on the quality of heart failure care in minority communities: a randomized trial                                                             | 2006 | Ann Intern Med                   | 145 | 4   | 273-283   | Sisk,J.E et al          | wrong population   |

|                                                                                                                                                                           |      |                               |     |   |         |                         |                   |
|---------------------------------------------------------------------------------------------------------------------------------------------------------------------------|------|-------------------------------|-----|---|---------|-------------------------|-------------------|
| Telephone interventions by nursing students: improving outcomes for heart failure patients in the community                                                               | 2006 | J Community Health Nurs       | 23  | 3 | 137-146 | Wheeler,E.C et al       | wrong population  |
| Exercise self-efficacy in older women with diastolic heart failure: results of a walking program and education intervention                                               | 2006 | J Gerontol Nurs               | 32  | 7 | 31-39   | Gary,R.                 | not found         |
| Lack of improvement of clinical outcomes by a low-cost, hospital-based heart failure management programme                                                                 | 2006 | J Cardiovasc Med (Hagerstown) | 7   | 8 | 614-622 | Nucifora,G et al        | wrong population  |
| Improving care at lower cost for end-stage heart and lung disease: integrating end of life planning with home care                                                        | 2006 | Mo Med                        | 103 | 2 | 146-151 | Edes,T.E et al          | not found         |
| A motivational counseling approach to improving heart failure self-care: mechanisms of effectiveness                                                                      | 2006 | J Cardiovasc Nurs             | 21  | 3 | 232-241 | Riegel,B et al          | wrong population  |
| Randomized controlled trial of telephone case management in Hispanics of Mexican origin with heart failure                                                                | 2006 | J Card Fail                   | 12  | 3 | 211-219 | Riegel,B et al          | wrong population  |
| Home telehealth improves clinical outcomes at lower cost for home healthcare                                                                                              | 2006 | Telemed J E Health            | 12  | 2 | 128-136 | Finkelstein,S.M et al   | wrong population  |
| The influences of postdischarge management by nurse practitioners on hospital readmission for heart failure                                                               | 2006 | J Am Acad Nurse Pract         | 18  | 4 | 154-160 | Delgado-Passler,P et al | systematic review |
| Prolonged effects of a home-based intervention in patients with chronic illness                                                                                           | 2006 | Arch Intern Med               | 166 | 6 | 645-650 | Pearson,S et al         | wrong population  |
| The impact of nurse-directed patient education on quality of life and functional capacity in people with heart failure                                                    | 2006 | J Am Acad Nurse Pract         | 18  | 3 | 116-123 | Kutzleb,J et al         | wrong population  |
| Computer-based education for patients with chronic heart failure. A randomised, controlled, multicentre trial of the effects on knowledge, compliance and quality of life | 2006 | Patient Educ Couns            | 64  | 1 | 128-135 | Stromberg,A et al       | wrong population  |

|                                                                                                                                                                                 |      |                    |     |    |         |                    |                        |
|---------------------------------------------------------------------------------------------------------------------------------------------------------------------------------|------|--------------------|-----|----|---------|--------------------|------------------------|
| [Outpatient medical and nurse management program in patients with chronic heart failure in a large territorial area in Piedmont. Four years of follow-up]                       | 2005 | Ital Heart J Suppl | 6   | 12 | 812-820 | Conte,M.R et al    | not found              |
| Benefits of comprehensive inpatient education and discharge planning combined with outpatient support in elderly patients with congestive heart failure                         | 2005 | Congest Heart Fail | 11  | 6  | 315-321 | Anderson,C et al   | wrong population       |
| Disease management produces limited quality-of-life improvements in patients with congestive heart failure: evidence from a randomized trial in community-dwelling patients     | 2005 | Am J Manag Care    | 11  | 11 | 701-713 | Smith,B et al      | wrong population       |
| Multidisciplinary and multisetting team management programme in heart failure patients affects hospitalisation and costing                                                      | 2006 | Int J Cardiol      | 111 | 3  | 377-385 | Piepoli,M.F et al  | wrong population       |
| [Randomised clinical trial to evaluate the efficacy of a multi-factorial intervention to reduce hospitalisation and improve the quality of life of patients with heart failure] | 2005 | Aten Primaria      | 36  | 5  | 280-283 | Brotos,C et al     | wrong publication type |
| Effects of a nurse-based heart failure clinic on drug utilization and admissions in a community hospital setting                                                                | 2005 | Scand Cardiovasc J | 39  | 4  | 199-205 | Andersen,M.K et al | wrong population       |
| Heart failure disease management: implementation and outcomes                                                                                                                   | 2005 | Whellan DJ         | 13  | 5  | 231-239 | Whellan,D.J        | systematic review      |
| Effect of home-based telecardiology on chronic heart failure: costs and outcomes                                                                                                | 2005 | J Telemed Telecare | 11  |    | 16-18   | Scalvini,S et al   | wrong population       |
| Impact of care at a multidisciplinary congestive heart failure clinic: a randomized trial                                                                                       | 2005 | CMAJ               | 173 | 1  | 40-45   | Ducharme,A et al   | wrong population       |
| Metaanalysis and review of heart failure disease management randomized controlled clinical trials                                                                               | 2005 | Am Heart J         | 149 | 4  | 722-729 | Whellan,D.J et al  | systematic review      |
| Just-in-time evidence-based e-mail "reminders" in home health care: impact on patient outcomes                                                                                  | 2005 | Health Serv Res    | 40  | 3  | 865-885 | Feldman,P.H et al  | wrong population       |

|                                                                                                                                                                                       |      |                       |    |    |           |                       |                   |
|---------------------------------------------------------------------------------------------------------------------------------------------------------------------------------------|------|-----------------------|----|----|-----------|-----------------------|-------------------|
| Just-in-time evidence-based e-mail "reminders" in home health care: impact on nurse practices                                                                                         | 2005 | Health Serv Res       | 40 | 3  | 849-864   | Murtaugh,C.M et al    | wrong population  |
| Systematic review of multidisciplinary interventions in heart failure                                                                                                                 | 2005 | Heart                 | 91 | 7  | 899-906   | Holl and ,R et al     | systematic review |
| Randomized trial of a nurse-administered, telephone-based disease management program for patients with heart failure                                                                  | 2005 | J Card Fail           | 11 | 5  | 358-365   | Dunagan,W.C et al     | wrong population  |
| State of the science: posthospitalization nursing interventions in congestive heart failure                                                                                           | 2005 | ANS Adv Nurs          | 28 | 2  | 175-190   | Hamner,J.B            | systematic review |
| Patient's education by nurse: what we really do achieve?                                                                                                                              | 2005 | Eur J Cardiovasc Nurs | 4  | 2  | 107-111   | Gonzalez,B et al      | not found         |
| Noninvasive home telemonitoring for patients with heart failure at high risk of recurrent admission and death: the Trans-European Network-Home-Care Management System (TEN-HMS) study | 2005 | J Am Coll Cardiol     | 45 | 10 | 1654-1664 | Clel and ,J.G et al   | wrong population  |
| Prospective evaluation of an outpatient heart failure disease management program designed for primary care: the Oregon model                                                          | 2005 | J Card Fail           | 11 | 4  | 293-298   | Hershberger,R.E et al | wrong population  |
| Early outcomes of a care coordination-enhanced telehome care program for elderly veterans with chronic heart failure                                                                  | 2005 | Telemed J E Health    | 11 | 1  | 20-27     | Schofield,R.S et al   | wrong population  |
| Randomised controlled trial of cardiac rehabilitation in elderly patients with heart failure                                                                                          | 2005 | Eur J Heart Fail      | 7  | 3  | 411-417   | Austin,J et al        | wrong population  |
| Patients with heart failure in primary health care: effects of a nurse-led intervention on health-related quality of life and depression                                              | 2005 | Eur J Heart Fail      | 7  | 3  | 393-403   | Martensson,J et al    | wrong population  |
| Effects of a nurse-led, clinic and home-based intervention on recurrent hospital use in chronic heart failure                                                                         | 2005 | Eur J Heart Fail      | 7  | 3  | 377-384   | Thompson,D.R et al    | wrong population  |
| A multicenter disease management program for hospitalized patients with heart failure                                                                                                 | 2004 | J Card Fail           | 10 | 6  | 473-480   | Tsuyuki,R.T et al     | wrong population  |

|                                                                                                                                                |      |                                |     |    |           |                     |                   |
|------------------------------------------------------------------------------------------------------------------------------------------------|------|--------------------------------|-----|----|-----------|---------------------|-------------------|
| The effects of nursing interventions to enhance mental health and quality of life among individuals with heart failure                         | 2004 | Appl Nurs Res                  | 17  | 4  | 248-256   | Scott,L.D et al     | wrong population  |
| Implementation of guidelines for management of heart failure in heart failure clinic: effects beyond pharmacological treatment                 | 2004 | Int J Cardiol                  | 97  | 3  | 411-416   | Lainscak,M          | wrong population  |
| Long-term healthcare and cost outcomes of disease management in a large, randomized, community-based population with heart failure             | 2004 | Circulation                    | 110 | 23 | 3518-3526 | Galbreath,A.D et al | wrong population  |
| Care management for low-risk patients with heart failure: a randomized, controlled trial                                                       | 2004 | Ann Intern Med                 | 141 | 8  | 606-613   | DeBusk,R.F et al    | wrong population  |
| Managing congestive heart failure using home telehealth                                                                                        | 2004 | Home Healthc Nurse             | 22  | 10 | 719-722   | Schneider,N.M       | wrong population  |
| Heart failure clinics and outpatient management: review of the evidence and call for quality assurance                                         | 2004 | Eur Heart J                    | 25  | 18 | 1596-1604 | Gustafsson,F et al  | systematic review |
| Multidisciplinary strategies for the management of heart failure patients at high risk for admission: a systematic review of randomized trials | 2004 | J Am Coll Cardiol              | 44  | 4  | 810-819   | McAlister,F.A et al | systematic review |
| Limited long term effects of a management programme for heart failure                                                                          | 2004 | Heart                          | 90  | 9  | 1010-1015 | Mejhert,M et al     | wrong population  |
| A literature review of cardiovascular disease management programs in managed care populations                                                  | 2004 | J Manag Care Pharm             | 10  | 4  | 326-344   | Ara,S               | systematic review |
| A randomized intervention to improve heart failure outcomes in community-based home health care                                                | 2004 | Home Health Care Serv Q        | 23  | 1  | 1-23      | Feldman,P.H et al   | wrong population  |
| [Case management for patients with congestive heart failure under ambulatory care--a critical review]                                          | 2004 | Z Arztl Fortbild Qualitatssich | 98  | 2  | 143-154   | Gensichen,J et al   | not found         |
| Transitional care of older adults hospitalized with heart failure: a randomized, controlled trial                                              | 2004 | J Am Geriatr Soc               | 52  | 5  | 675-684   | Naylor,M.D et al    | wrong population  |
| The comprehensive care team: a controlled trial of outpatient palliative medicine consultation                                                 | 2004 | Arch Intern Med                | 164 | 1  | 83-91     | Rabow,M.W et al     | wrong population  |
| Effects of education, self-care instruction and physical exercise on patients with chronic heart failure                                       | 2003 | Z Kardiol                      | 92  | 12 | 985-993   | Miche,E et al       | wrong population  |

|                                                                                                                                                               |      |                         |     |   |         |                   |                    |
|---------------------------------------------------------------------------------------------------------------------------------------------------------------|------|-------------------------|-----|---|---------|-------------------|--------------------|
| A disease management program for heart failure: collaboration between a home care agency and a care management organization                                   | 2003 | Lippincotts Case Manag  | 8   | 6 | 265-273 | Gorski,L.A et al  | wrong population   |
| Palliative care management: a Veterans Administration demonstration project                                                                                   | 2003 | J Palliat Med           | 6   | 5 | 831-839 | Rosenfeld,K et al | background article |
| A systematic review of telemonitoring for the management of heart failure                                                                                     | 2003 | Eur J Heart Fail        | 5   | 5 | 583-590 | Louis,A.A et al   | systematic review  |
| Use of the short form 36 in a primary care based disease management program for patients with congestive heart failure                                        | 2003 | Dis Manag               | 6   | 2 | 111-117 | Sidorov,J et al   | wrong population   |
| [Management programs for elderly patients with chronic heart failure]                                                                                         | 2003 | Clin Ter                | 154 | 3 | 199-206 | Pulignano,G et al | not found          |
| Cardiac rehabilitation with nurse care management and telephonic interactions at a community hospital: program evaluation of participation and lipid outcomes | 2003 | Lippincotts Case Manag  | 8   | 4 | 141-157 | Harris,D.E et al  | wrong population   |
| Effects of an exercise adherence intervention on outcomes in patients with heart failure                                                                      | 2003 | Rehabil Nurs            | 28  | 4 | 117-122 | Duncan,K et al    | wrong population   |
| Uptake of self-management strategies in a heart failure management programme                                                                                  | 2003 | Eur J Heart Fail        | 5   | 3 | 371-380 | Wright,S.P et al  | wrong population   |
| A randomized trial of telenursing to reduce hospitalization for heart failure: patient-centered outcomes and nursing indicators                               | 2003 | Home Health Care Serv Q | 22  | 1 | 1-20    | Jerant,A.F et al  | wrong population   |
| Case management in a heterogeneous congestive heart failure population: a randomized controlled trial                                                         | 2003 | Arch Intern Med         | 163 | 7 | 809-817 | Laramée,A.S et al | wrong population   |
| Heart failure disease management: impact on hospital care, length of stay, and reimbursement                                                                  | 2003 | Congest Heart Fail      | 9   | 2 | 77-83   | Discher,C.L et al | wrong population   |
| Managing heart failure in the community; role of the nurse specialist                                                                                         | 2001 | Health Bull (Edinb)     | 59  | 5 | 340-342 | Smith,M et al     | not found          |
| Outcomes of chronic heart failure                                                                                                                             | 2003 | Arch Intern Med         | 163 | 3 | 347-352 | Benatar,D et al   | wrong population   |

|                                                                                                                                                                         |      |                    |     |    |           |                   |                    |
|-------------------------------------------------------------------------------------------------------------------------------------------------------------------------|------|--------------------|-----|----|-----------|-------------------|--------------------|
| Telemanagement of heart failure: a diuretic treatment algorithm for advanced practice nurses                                                                            | 2002 | Heart Lung         | 31  | 5  | 340-347   | Mueller,T.M et al | background article |
| Symptom status and quality-of-life outcomes of home-based disease management program for heart failure patients                                                         | 2002 | Outcomes Manag     | 6   | 4  | 161-168   | Todero,C.M et al  | wrong population   |
| Cost/utility ratio in chronic heart failure: comparison between heart failure management program delivered by day-hospital and usual care                               | 2002 | J Am Coll Cardiol  | 40  | 7  | 1259-1266 | Capomolla,S et al | wrong population   |
| Heart failure management: multidisciplinary care has intrinsic benefit above the optimization of medical care                                                           | 2002 | J Card Fail        | 8   | 3  | 142-148   | McDonald,K et al  | wrong population   |
| Home-based intervention in congestive heart failure: long-term implications on readmission and survival                                                                 | 2002 | Circulation        | 105 | 24 | 2861-2866 | Stewart,S et al   | wrong population   |
| [Impact of a nurse-based heart failure management program on hospitalization rate, functional status, quality of life, and medical costs]                               | 2002 | Ital Heart J Suppl | 3   | 5  | 532-538   | Chinaglia,A et al | not found          |
| Effect of a heart failure clinic on survival and hospital readmission in patients discharged from acute hospital care                                                   | 2002 | Eur J Heart Fail   | 4   | 3  | 353-359   | Azevedo,A et al   | wrong population   |
| Detecting early clinical deterioration in chronic heart failure patients post-acute hospitalisation-a critical component of multidisciplinary, home-based intervention? | 2002 | Eur J Heart Fail   | 4   | 3  | 345-351   | Stewart,S et al   | wrong population   |
| Quantification of interventions and outcomes in an outpatient telemanagement and care management congestive heart failure program                                       | 2000 | Congest Heart Fail | 6   | 3  | 146-151   | Palladino,M et al | wrong population   |
| Quality of life of individuals with heart failure: a randomized trial of the effectiveness of two models of hospital-to-home transition                                 | 2002 | Med Care           | 40  | 4  | 271-282   | Harrison,M. et al | wrong population   |
| APN spells success for a heart failure program                                                                                                                          | 2002 | Nurs Manage        | 33  | 2  | 46-48     | Dahl,J et al      | background article |
| Improving the quality of home care for patients with heart failure                                                                                                      | 2002 | Caring             | 21  | 3  | 10-14     | Gorski,L.A        | not found          |



|                                                                                                                                             |      |                            |     |    |           |                     |                    |
|---------------------------------------------------------------------------------------------------------------------------------------------|------|----------------------------|-----|----|-----------|---------------------|--------------------|
| Effect of a standardized nurse case-management telephone intervention on resource use in patients with chronic heart failure                | 2002 | Arch Intern Med            | 162 | 6  | 705-712   | Riegel,B et al      | wrong population   |
| Use of a clinical care map for the management of congestive heart failure in a community hospital                                           | 2001 | Congest Heart Fail         | 7   | 1  | 37-42     | Lanzieri,M et al    | wrong population   |
| A randomized trial of the efficacy of multidisciplinary care in heart failure outpatients at high risk of hospital readmission              | 2002 | J Am Coll Cardiol          | 39  | 3  | 471-480   | Kasper,E.K et al    | wrong population   |
| Randomized, controlled trial of integrated heart failure management: The Auckland Heart Failure Management Study                            | 2002 | Eur Heart J                | 23  | 2  | 139-146   | Doughty,R.N et al   | wrong intervention |
| Compliance and effectiveness of 1 year's home telemonitoring. The report of a pilot study of patients with chronic heart failure            | 2001 | Eur J Heart Fail           | 3   | 6  | 723-730   | de,Lusignan S et al | wrong population   |
| Reducing the cost of frequent hospital admissions for congestive heart failure: a randomized trial of a home telecare intervention          | 2001 | Med Care                   | 39  | 11 | 1234-1245 | Jerant,A et al      | wrong population   |
| Cost-effective outpatient management of persons with heart failure                                                                          | 2001 | Prog Cardiovasc Nurs       | 16  | 2  | 50-56     | Henrick,A           | wrong population   |
| A systematic review of randomized trials of disease management programs in heart failure                                                    | 2001 | Am J Med                   | 110 | 5  | 378-384   | McAlister,F.A et al | systematic review  |
| Effectiveness of team-managed home-based primary care: a randomized multicenter trial                                                       | 2000 | JAMA                       | 284 | 22 | 2877-2885 | Hughes,S.L et al    | wrong population   |
| Which patients with heart failure respond best to multidisciplinary disease management?                                                     | 2000 | J Card Fail                | 6   | 4  | 290-299   | Riegel,B et al      | wrong population   |
| A pilot study of radiotelemetry for continuous cardiopulmonary monitoring of patients at home                                               | 2000 | J Telemed Telecare         | 6   |    | S119-S122 | de,Lusignan S et al | wrong population   |
| A controlled pilot study in the use of telemedicine in the community on the management of heart failure--a report of the first three months | 1999 | Stud Health Technol Inform | 64  |    | 126-137   | de,Lusignan S et al | not found          |
| Impact of a nurse-managed heart failure clinic: a pilot study                                                                               | 2000 | Am J Crit Care             | 9   | 2  | 140-146   | Paul,S              | not found          |

|                                                                                                                                                               |      |                    |     |    |           |                       |                    |
|---------------------------------------------------------------------------------------------------------------------------------------------------------------|------|--------------------|-----|----|-----------|-----------------------|--------------------|
| Enhanced access to primary care for patients with congestive heart failure. Veterans Affairs Cooperative Study Group on Primary Care and Hospital Readmission | 1999 | Eff Clin Pract     | 2   | 5  | 201-209   | Oddone,E.Z et al      | wrong population   |
| Implementing a congestive heart failure disease management program to decrease length of stay and cost                                                        | 1999 | J Cardiovasc Nurs  | 14  | 1  | 55-74     | Knox,D et al          | not found          |
| Effect of a home monitoring system on hospitalization and resource use for patients with heart failure                                                        | 1999 | Am Heart J         | 138 | 4  | 633-640   | Heidenreich,P.A et al | wrong population   |
| A community hospital-based congestive heart failure program: impact on length of stay, admission and readmission rates, and cost                              | 1999 | Am J Manag Care    | 5   | 1  | 37-43     | Rauh,R.A et al        | wrong population   |
| Heart failure disease management: a critical review                                                                                                           | 1999 | J Card Fail        | 5   | 1  | 64-75     | Rich,M.W              | systematic review  |
| Comprehensive multidisciplinary programs for the management of patients with congestive heart failure                                                         | 1999 | J Gen Intern Med   | 14  | 2  | 130-135   | Philbin,E.F           | systematic review  |
| Cost effective management programme for heart failure reduces hospitalisation                                                                                 | 1998 | Heart              | 80  | 5  | 442-446   | Cline,C.M et al       | wrong population   |
| Effects of a home-based intervention among patients with congestive heart failure discharged from acute hospital care                                         | 1998 | Arch Intern Med    | 158 | 10 | 1067-1072 | Stewart,S et al       | wrong population   |
| Using case management with clinical plans to improve patient outcomes                                                                                         | 1998 | Home Healthc Nurse | 16  | 1  | 15-20     | Huggins,C.M et al     | background article |
| Symptomatic improvement and reduced hospitalization for patients attending a cardiomyopathy clinic                                                            | 1997 | Clin Cardiol       | 20  | 11 | 949-954   | Smith,L.E et al       | wrong population   |
| Assessment--patients, chronic heart failure, and home care                                                                                                    | 1997 | Caring             | 16  | 6  | 20-2, 24  | Lazarre,M et al       | not found          |
| A study of the relationship between home care services and hospital readmission of patients with congestive heart failure                                     | 1997 | Home Healthc Nurse | 15  | 2  | 123-129   | Martens,K.H et al     | wrong population   |

|                                                                                                                                                       |      |                     |     |    |             |                        |                    |
|-------------------------------------------------------------------------------------------------------------------------------------------------------|------|---------------------|-----|----|-------------|------------------------|--------------------|
| A comprehensive management system for heart failure improves clinical outcomes and reduces medical resource utilization                               | 1997 | Am J Cardiol        | 79  | 1  | 58-63       | West,J.A et al         | wrong population   |
| Disease management for chronic congestive heart failure                                                                                               | 1996 | J Cardiovasc Nurs   | 11  | 1  | 54-62       | Brass-Mynderse,N.J     | background article |
| Does increased access to primary care reduce hospital readmissions? Veterans Affairs Cooperative Study Group on Primary Care and Hospital Readmission | 1996 | N Engl J Med        | 334 | 22 | 1441-1447   | Weinberger,M et al     | wrong population   |
| The effect of a nurse-managed CHF clinic on patient readmission and length of stay                                                                    | 1996 | Home Healthc Nurse  | 14  | 5  | 351-356     | Lasater,M.             | background article |
| The connection delivery model: care across the continuum                                                                                              | 1996 | Nurs Manage         | 27  | 5  | 34, 36      | Donlevy,J.A et al      | not found          |
| A multidisciplinary intervention to prevent the readmission of elderly patients with congestive heart failure                                         | 1995 | N Engl J Med        | 333 | 18 | 1190-1195   | Rich,M.W et al         | wrong population   |
| Home monitoring for congestive heart failure patients                                                                                                 | 1995 | Caring              | 14  | 8  | 53-54       | Miller,P.Z             | wrong population   |
| Prevention of readmission in elderly patients with congestive heart failure: results of a prospective, randomized pilot study                         | 1993 | J Gen Intern Med    | 8   | 11 | 585-590     | Rich,M.W et al         | wrong population   |
| Improving Heart Failure Self-Management Support by Actively Engaging Out-of-Home Caregivers: Results of a Feasibility Study                           | 2013 | Congest Heart Fail  | 14  | 1  |             | Piette,J.D et al       | wrong population   |
| Blended collaborative care to treat heart failure and comorbid depression: Rationale and Study Design of the Hopeful Heart Trial                      | 2019 | Psychosom Med       | 81  | 6  | 495-505     | Herbeck,Belnap B et al | wrong population   |
| Application of transitional care model in patients with chronic heart disease: A case-controlled intervention study                                   | 2018 | Rev Latam HTA       | 13  | 3  | 285-290     | Rezapour-Nasrabad,R    | wrong population   |
| Clinical investigation on the nursing needs of heart failure patients and analysis of planning nursing intervention effect                            | 2017 | Biomedical Research | 28  | 22 | 10084-10087 | Chen,C et al           | wrong population   |

|                                                                                                                                                                                                            |      |                             |     |    |           |                      |                   |
|------------------------------------------------------------------------------------------------------------------------------------------------------------------------------------------------------------|------|-----------------------------|-----|----|-----------|----------------------|-------------------|
| Palliative Care Interventions for Patients with Heart Failure: A Systematic Review and Meta-Analysis                                                                                                       | 2017 | J Palliat Med               | 20  | 1  | 84-92     | Diop,M.S et al       | systematic review |
| Case conference primary-secondary care planning at end of life can reduce the cost of hospitalisations                                                                                                     | 2016 | BMC Palliat Care            | 15  | 1  |           | Hollingworth,S et al | wrong population  |
| Primary results of the Patient-Centered Disease Management (PCDM) for heart failure study a randomized clinical trial                                                                                      | 2015 | JAMA Intern Med             | 175 | 5  | 725-732   | Bekelman,D.B et al   | wrong population  |
| A Mobile Health Intervention Supporting Heart Failure Patients and Their Informal Caregivers: A Randomized Comparative Effectiveness Trial                                                                 | 2015 | J Med Internet Res          | 17  | 6  | e142      | Piette,J.D et al     | wrong population  |
| Program evaluation of remote heart failure monitoring: healthcare utilization analysis in a rural regional medical center                                                                                  | 2015 | Telemed J E Health          | 21  | 3  | 157-162   | Riley,W.T et al      | wrong population  |
| Cardiauvergne: Heart failure home management and remote monitoring system. [French]                                                                                                                        | 2014 | Soins                       | 3   | 4  | 169-176   | Eschaliere,R et al   | wrong population  |
| Manpower and outpatient clinic workload for remote monitoring of patients with cardiac implantable electronic devices: Data from the HomeGuide registry                                                    | 2014 | J Cardiovasc Electrophysiol | 25  | 11 | 1216-1223 | Ricci,R.P et al      | wrong population  |
| Home-based advance care programme is effective in reducing hospitalisations of advanced heart failure patients: A clinical and healthcare cost study                                                       | 2013 | Ann Acad Med Singap         | 42  | 9  | 466-471   | Wong,R.C.C et al     | not found         |
| Remote monitoring after recent hospital discharge in patients with heart failure: A systematic review and network meta-analysis                                                                            | 2013 | Heart                       | 99  | 23 | 1717-1726 | Pandor, A et al      | systematic review |
| Mode of action and effects of standardized collaborative disease management on mortality and morbidity in patients with systolic heart failure the interdisciplinary network for heart failure (INH) study | 2012 | Circ Heart Fail             | 5   | 1  | 25-35     | Angermann,C.E et al  | wrong population  |

|                                                                                                                                                                       |      |                                   |     |    |           |                       |                    |
|-----------------------------------------------------------------------------------------------------------------------------------------------------------------------|------|-----------------------------------|-----|----|-----------|-----------------------|--------------------|
| Outcomes of a telehealth intervention for homebound older adults with heart or chronic respiratory failure: a randomized controlled trial                             | 2012 | Gerontologist                     | 52  | 4  | 541-552   | Gellis,Z.D et al      | wrong population   |
| Hospital initiative reduces heart failure readmissions                                                                                                                | 2012 | Hosp Case Manag                   | 20  | 11 | 161-163   | No authors listed     | not found          |
| The "Kremser model": Successful disease management programme for patients with chronic heart failure. [German]                                                        | 2011 | Journal fur Kardiologie           | 18  | 9  | 299-306   | Bohmer,A et al        | wrong population   |
| Telemonitoring with case management for seniors with heart failure                                                                                                    | 2011 | Am J Manag Care                   | 17  | 3  | e71-e79   | Wade,M,J et al        | wrong population   |
| Clinical trials update from the European Society of Cardiology Heart Failure meeting 2011: TEHAF, WHICH, CARVIVA, and atrial fibrillation in GISSI-HF and EMPHASIS-HF | 2011 | Eur J Heart Fail                  | 13  | 10 | 1147-1151 | Clel and ,J.G.F et al | wrong population   |
| Improving heart failure in home care with chronic disease management and telemonitoring                                                                               | 2010 | Home Healthc Nurse                | 28  | 10 | 606-617   | Hall,P et al          | background article |
| The effect of shared medical visits on knowledge and self-care in patients with heart failure: A pilot study                                                          | 2009 | Heart Lung                        | 38  | 1  | 25-33     | Yehle,K.S et al       | wrong population   |
| Telehealth helps hospital cut readmissions by 75%                                                                                                                     | 2007 | Healthcare Benchmarks Qual Improv | 14  | 8  | 92-94     | No authors listed     | not found          |
| Therapeutic education and multidisciplinary approaches in heart failure. [French]                                                                                     | 2009 | Medecine Therapeutique - Cardio   | 4   | 1  | 79-87     | Assyag,P et al        | not found          |
| Community cardiology clinics for secondary prevention of coronary heart disease and heart failure in primary care                                                     | 2008 | Cardiol Review                    | 25  | 12 | 64-67     | Khunti,K et al        | not found          |
| Impact of specialist care in patients with newly diagnosed heart failure: A randomised controlled study                                                               | 2007 | Int J Cardiol                     | 115 | 2  | 196-202   | Rao,A et al           | wrong population   |
| Feasibility and efficacy of a hybrid post-discharge service for patients with acute heart failure - The tyrolean model. [German]                                      | 2007 | Journal fur Kardiologie           | 14  | 1  | 13-17     | Metzler,B et al       | not found          |

|                                                                                                                          |      |                                                 |     |    |           |                    |                    |
|--------------------------------------------------------------------------------------------------------------------------|------|-------------------------------------------------|-----|----|-----------|--------------------|--------------------|
| Alternative healthcare models for patients with heart failure: A systematic review. [Spanish]                            | 2006 | Revista de Calidad Asistencial                  | 21  | 1  | 51-60     | Morales,J.M et al  | systematic review  |
| Tele-homecare for chronically-ill patients: Improved outcomes and new developments                                       | 2004 | Journal on Information Technology in Healthcare | 2   | 4  | 251-262   | Robinson,S et al   | wrong population   |
| Management of the Patient with Congestive Heart Failure in the Home Care and Palliative Care Setting                     | 2004 | Annals of Long-Term Care                        | 12  | 1  | 33-37     | Quaglietti,S et al | not found          |
| A community-based service for patients with congestive cardiac failure: Impact on quality of life scores                 | 2004 | British Journal of Cardiology                   | 11  | 1  | 75-79     | Williams,H et al   | not found          |
| Interdisciplinary team-based management of heart failure                                                                 | 2003 | Disease Management and Health Outcomes          | 11  | 2  | 87-94     | Di Salvo,T.G et al | background article |
| Care management interventions for older patients with congestive heart failure                                           | 2003 | American Journal of Managed Care                | 9   | 6  | 447-459   | Windham,B.G et al  | not found          |
| Establishment of a nurse-led heart failure clinic. Design and baseline data from the first two years. [Danish]           | 2003 | Ugeskrift for Laeger                            | 165 | 7  | 686-690   | Galatius,S et al   | not found          |
| Specialist Nurse-Led Intervention in Outpatients with Congestive Heart Failure: Impact on Clinical and Economic Outcomes | 2003 | Disease Management and Health Outcomes          | 11  | 11 | 693-698   | Palmer,N.D et al   | background article |
| Heart failure programs and comprehensive management in heart failure. [Italian]                                          | 2002 | Monaldi Archives for Chest Disease              | 58  | 2  | 135-139   | Di,Lenarda A et al | background article |
| Standardized telephonic case management in a Hispanic heart failure population: An effective intervention                | 2002 | Disease Management and Health Outcomes          | 10  | 4  | 241-249   | Riegel,B et al     | wrong population   |
| An economic analysis of specialist heart failure nurse management in the U.K.: Can we afford not to implement it?        | 2002 | European Heart Journal                          | 23  | 17 | 1369-1378 | Stewart,S et al    | wrong population   |
| Optimising delivery of care for chronic heart failure                                                                    | 2000 | Journal of Clinical Excellence                  | 1   | 4  | 209-215   | Clark,A.L et al    | not found          |

|                                                                                                                                                                                                         |      |                               |     |    |           |                       |                   |
|---------------------------------------------------------------------------------------------------------------------------------------------------------------------------------------------------------|------|-------------------------------|-----|----|-----------|-----------------------|-------------------|
| Cost-effectiveness analysis in clinical practice: The case of heart failure                                                                                                                             | 1999 | Archives of Internal Medicine | 159 | 15 | 1690-1700 | Rich,M.W et al        | systematic review |
| Structured telephone support or non-invasive telemonitoring for patients with heart failure                                                                                                             | 2015 | Cochrane Database of Syst Rev |     | 10 | CD007228  | Inglis,S.C et al      | systematic review |
| A new programme of multidisciplinary care for patients with heart failure in Poznań: one-year follow-up                                                                                                 | 2006 | Kardiol Pol                   | 64  | 10 | 1063-70   | Wierzbowski, M et al  | not found         |
| Efficacy of a Physician-Led Multiparametric Telemonitoring System in Very Old Adults with Heart Failure                                                                                                 | 2015 | J Am Geriatr Soc              | 63  | 6  | 1175-80   | Pedone,C et al        | wrong population  |
| A randomised controlled trial of a facilitated home-based rehabilitation intervention in patients with heart failure with preserved ejection fraction and their caregivers: the REACH-HFpEF Pilot Study | 2018 | BMJ Open                      | 8   | 4  | e019649   | Lang,C.C et al        | wrong population  |
| Evaluation of a home-based intervention in heart failure patients. Results of a randomized study                                                                                                        | 2005 | Rev Esp Cardiol               | 58  | 6  | 618-25    | Morcillo,C et al      | wrong population  |
| Economic evaluation of Manitoba Health Lines in the management of congestive heart failure                                                                                                              | 2013 | Healthc Policy                | 9   | 2  | 36-50     | Cui,Y et al           | wrong population  |
| Physical function and quality of life in older women with diastolic heart failure: effects of a progressive walking program on sleep patterns                                                           | 2007 | Prog Cardiovasc Nurs          | 22  | 2  | 72-80     | Gary,R et al          | wrong population  |
| Randomized, controlled evaluation of short- and long-term benefits of heart failure disease management within a diverse provider network: the SPAN-CHF trial                                            | 2004 | Circulation                   | 110 | 11 | 1450-5    | Kimmelstiel,C et al   | wrong population  |
| Cognitive Behavior Therapy for Depression and Self-Care in Heart Failure Patients: a Randomized Clinical Trial                                                                                          | 2015 | JAMA Intern Med               | 175 | 11 | 1773-82   | Freedl and ,K.E et al | wrong population  |
| Outcomes of home management methods for chronic heart failure                                                                                                                                           | 2002 | Doctoral thesis               |     |    |           | Bondmass,M.D          | not found         |

|                                                                                                                                               |      |                                    |     |    |         |                           |                   |
|-----------------------------------------------------------------------------------------------------------------------------------------------|------|------------------------------------|-----|----|---------|---------------------------|-------------------|
| Effects of three different disease management programs on outcomes in patients hospitalized with heart failure: a randomized trial            | 2012 | Med Clin (Barc)                    | 138 | 5  | 192-8   | Gamez-Lopez,A.L et al     | wrong population  |
| A randomized controlled trial of self-management programme improves health-related outcomes of older people with heart failure                | 2013 | J Adv Nurs                         | 69  | 11 | 2458-69 | Jung-Hua, S et al         | wrong population  |
| A Review: Discharge Navigation and Its Effect on Heart Failure Readmissions                                                                   | 2014 | Prof Case Manag                    | 19  | 5  | 224-234 | Schell,W                  | systematic review |
| Advanced Practice Nurse Intervention and Heart Failure Readmissions                                                                           | 2018 | Doctoral thesis                    |     |    |         | Reynolds,T                | wrong population  |
| Case management for patients with heart failure: a quality improvement intervention                                                           | 2005 | J Gerontol Nurs                    | 31  | 5  | 20-28   | Miller,L.C et al          | not found         |
| Chronic Heart Failure Management in Rural Primary Care                                                                                        | 2016 | J Dr Nurs Pract                    | 9   | 1  | 20-28   | Kreifels,E et al          | not found         |
| Clinical pathway versus a usual plan of care for patients with congestive heart failure: what's the difference?...part 1 of a two-part series | 2001 | Home Healthc Nurse                 | 19  | 3  | 142-150 | Hoskins,L.M et al         | wrong population  |
| Communication Between the Primary Care Physician and the Hospitalist at the Time of Patient Admission                                         | 2012 | JCOM                               | 19  | 10 | 453-459 | Hennrikus,E               | wrong population  |
| Comparison of Health Buddy with traditional approaches to heart failure management                                                            | 2003 | Fam Community Health               | 26  | 4  | 275-288 | LaFramboise,L.M et al     | wrong population  |
| Effectiveness of Interprofessional Care Teams on Reducing Hospital Readmissions in Patients with Heart Failure: A Systematic Review           | 2018 | MedSurg Nursing                    | 27  | 3  | 177-185 | Shah,B                    | systematic review |
| Effects of education on self-care behaviour and quality of life in patients with chronic heart failure                                        | 2010 | The World of Critical Care Nursing | 7   | 2  | 115-121 | Enç, N et al              | wrong population  |
| Effects of home-based care program on symptom alleviation and well-being among persons with chronic heart failure                             | 2008 | Thai Journal of Nursing Research   | 12  | 1  | 25-39   | Wongpiriyayothar ,A et al | not found         |
| Implementing a congestive heart failure outpatient program                                                                                    | 1999 | not listed                         | 6   | 7  | 14-18   | Schwabauer,N.J et al      | not found         |



|                                                                                                                                               |      |                                        |     |    |         |                          |                    |
|-----------------------------------------------------------------------------------------------------------------------------------------------|------|----------------------------------------|-----|----|---------|--------------------------|--------------------|
| Incorporating Technology to Decrease Heart Failure Readmission Rates                                                                          | 2018 | Doctoral thesis                        |     |    |         | Thames,V                 | wrong population   |
| Nursing approach to a patient with cardiac insufficiency in Primary Care                                                                      | 2012 | Metas de enfermería                    | 15  | 10 | 56-61   | Prats-Guardiola, M et al | not found          |
| Randomized control trial of a self-management intervention for heart failure older adults in Northern Taiwan                                  | 2019 | Australian Collage of Nursing          | 26  | 2  | 288-294 | Shao,J et al             | wrong population   |
| Research corner. Utilization of home health care services by elderly patients with heart failure                                              | 1998 | not listed                             | 10  | 4  | 66-73   | Moulton,P.J et al        | wrong population   |
| Research on reducing hospitalizations in patients with chronic heart failure                                                                  | 2010 | Home Healthc Nurse                     | 28  | 6  | 335-340 | McGhee,G et al           | background article |
| Self-care and improved outcomes: an intervention by heart failure nurse specialists                                                           | 2016 | British J Cardiac Nurs                 | 11  | 2  | 82-88   | MacInnes,J et al         | wrong population   |
| Technology-enhanced practice for patients with chronic cardiac disease: Home implementation and evaluation                                    | 2010 | Heart Lung                             | 39  | 6  | S34-S46 | Brennan,P.F et al        | wrong population   |
| Telephone-based, nursing follow-up of patients with heart failure                                                                             | 2011 | not listed                             | 14  | 3  | 22-26   | Just,M et al             | wrong population   |
| The Influence of Remote Monitoring on Clinical Decision Making                                                                                | 2016 | Home Healthc Manag Prac                | 28  | 2  | 86-93   | Williams,C et al         | not found          |
| The role of community-based nursing interventions in improving outcomes for individuals with cardiovascular disease: A systematic review      | 2019 | Int J Nurs Stud                        | 100 |    | N-N     | Han,E et al              | systematic review  |
| The impact of a community-based heart failure multidisciplinary team clinic on healthcare utilization and costs                               | 2022 | ESC Heart Fail.                        | 9   | 1  | 676–684 | Weinstein et al          | wrong intervention |
| Examining Adherence and Dose Effect of an Early Palliative Care Intervention for Advanced Heart Failure Patients                              | 2021 | J Pain Symptom Manage.                 | 62  | 3  | 471-481 | Wells, R                 | wrong study design |
| Association between communitybased nurse practitioner support, self-care behaviour and quality of life in patients with chronic heart failure | 2021 | Australian Journal of Advanced Nursing | 38  | 3  | 25-32   | Sheau Huey, Chen         | wrong population   |

|                                                                                                                                                                                                |      |                                                       |     |    |           |                     |                  |
|------------------------------------------------------------------------------------------------------------------------------------------------------------------------------------------------|------|-------------------------------------------------------|-----|----|-----------|---------------------|------------------|
| An inpatient multidisciplinary educational approach to reduce 30-day heart failure readmissions                                                                                                | 2021 | Saudi Pharm J                                         | 29  | 4  | 337-342   | Aljabri, A          | wrong population |
| A Randomized Controlled Trial of Heart Failure Disease Management in Skilled Nursing Facilities                                                                                                | 2022 | J Am Med Dir Assoc                                    | 23  | 3  | 359-366   | Boxer, R. S. et al  | wrong population |
| Challenges of Telemonitoring Programs for Complex Chronic Conditions: Randomized Controlled Trial With an Embedded Qualitative Study                                                           | 2022 | J Med Internet Res                                    | 24  | 1  | e31754    | Ware, P et al       | wrong population |
| Disease Management in Skilled Nursing Facilities Improves Outcomes for Patients With a Primary Diagnosis of Heart Failure                                                                      | 2021 | Journal of the American Medical Directors Association | 0   | 0  | 367-372   | Weerahandi, H et al | wrong population |
| Disease management with home telemonitoring aimed at substitution of usual care in the Netherlands: Post-hoc analyses of the e-Vita HF study                                                   | 2022 | J Cardiol                                             | 79  | 1  | 1-5       | Brons, M et al      | wrong population |
| Efficacy of Blended Collaborative Care for Patients With Heart Failure and Comorbid Depression: A Randomized Clinical Trial                                                                    | 2021 | JAMA Intern Med                                       | 181 | 10 | 1369-1380 | Rollman, B. L et al | wrong population |
| Implementation of early follow-up care after heart failure hospitalization                                                                                                                     | 2021 | Am J Manag Care                                       | 27  | 2  | E42-e47   | Dev, S et al        | wrong population |
| Managing patients with heart failure: contemporary real-world experience                                                                                                                       | 2022 | BMC research notes                                    | 15  | 1  | 41        | Siddiqui, M et al   | wrong population |
| The effectiveness of a nurse-led home-based heart failure self-management programme (the HOM-HEMP) for patients with chronic heart failure: A three-arm stratified randomized controlled trial | 2021 | Int J Nurs Stud                                       | 122 | 0  | 104026    | Jiang, Y et al      | wrong population |
| The Effect of Rehospitalization and Emergency Department Visits on Subsequent Adherence to Weight Telemonitoring                                                                               | 2021 | J Cardiovasc Nurs                                     | 36  | 5  | 482-488   | Haynes, S. C et al  | wrong population |
| The Impact of Nurse-Led Cardiac Rehabilitation on Quality of Life and Biophysiological Parameters in Patients With Heart Failure: A Randomized Clinical Trial                                  | 2021 | Journal of Nursing Research                           | 29  | 1  | e130-e130 | Arjunan et al       | wrong population |

|                                                                                                                                                                                                          |      |                                            |     |    |          |                 |                   |
|----------------------------------------------------------------------------------------------------------------------------------------------------------------------------------------------------------|------|--------------------------------------------|-----|----|----------|-----------------|-------------------|
| A quasi-experimental study examining a nurse-led educational program to improve disease knowledge and self-care for patients with acute decompensated heart failure with reduced ejection fraction       | 2021 | Adv Clin Exp Med                           | 0   | 0  | -        | Kolasa, J et al | wrong population  |
| Effect of nurse-led hospital-to-home transitional care interventions on mortality and psychosocial outcomes in adults with heart failure: a meta-analysis                                                | 2021 | Eur J Cardiovasc Nurs                      | 18  | 0  | zvab105  | Li, Y et al     | systematic review |
| The effectiveness of transitional care interventions for adult people with heart failure on patient-centered health outcomes: A systematic review and meta-analysis including dose-response relationship | 2021 | International journal of nursing studies   | 117 | 0  | 103902   | Li, Y et al     | systematic review |
| Effects of nurse-led transitional care interventions for patients with heart failure on healthcare utilization: A meta-analysis of randomized controlled trials                                          | 2021 | PLoS One                                   | 16  | 12 | E0261300 | Li, Y et al     | systematic review |
| The impact of nurse practitioners on health outcomes in outpatient heart failure management: a systematic review                                                                                         | 2021 | Canadian Journal of Cardiovascular Nursing | 31  | 2  | 13-17    | Fichadiya et al | systematic review |
| The impact of nurse-led community-based models of care on hospital admission rates in heart failure patients: An integrative review                                                                      | 2021 | Heart Lung                                 | 50  | 5  | 685-692  | Ledwin et al    | systematic review |

**Table S2. ROBINS-I adaptation**

| Bias domain                                                                                                                   | Signaling questions                                                                                                                                    | Description                                                                                                                                                                                                                                                                           | Response option |
|-------------------------------------------------------------------------------------------------------------------------------|--------------------------------------------------------------------------------------------------------------------------------------------------------|---------------------------------------------------------------------------------------------------------------------------------------------------------------------------------------------------------------------------------------------------------------------------------------|-----------------|
| Domain 1. Bias due to confounding (prognostic factors - thus related to the outcome- also related to intervention assignment) | 1.1 Is there any reason to think that patients were "too much stable" during the period? or patients were too decompensate during the period?          | The first question assesses the risk of the survivor, the second assesses the risk of the disease's own decline                                                                                                                                                                       | Y/PY/PN/N       |
|                                                                                                                               | 1.4 If Y or PY to 1.1: The authors performed any specific analysis to mitigate that bias?                                                              |                                                                                                                                                                                                                                                                                       | Y/PY/PN/N       |
|                                                                                                                               | 1.6. Did the authors control for any post-intervention variables that could have been affected by the intervention?                                    | Controlling for post-intervention variables that are affected by intervention is not appropriate. Controlling for mediating variables estimates the direct effect of intervention and may introduce bias. Controlling for common effects of intervention and outcome introduces bias. | Y/PY/PN/N       |
|                                                                                                                               |                                                                                                                                                        |                                                                                                                                                                                                                                                                                       | Risk of bias:   |
| Domain 2. Bias in selection of participants into the study                                                                    | 2.1 Was selection of participants into the study (or into the analysis) based on participant characteristics observed after the start of intervention? | Inclusion criteria previously defined                                                                                                                                                                                                                                                 | Y/PY/PN/N       |
|                                                                                                                               | 2.4 Do start of follow-up and start of intervention coincides for most participants?                                                                   | If participants are not followed from the start of the intervention then a period of follow up has been excluded, and individuals who experienced the outcome soon after intervention will be missing from analyses. This problem may occur when prevalent, rather than               | Y/PY/PN/N       |

|                                                              |                                                                                                                             |                                                                                                                                                                                                                                                                                                                                                                                                                                             |               |
|--------------------------------------------------------------|-----------------------------------------------------------------------------------------------------------------------------|---------------------------------------------------------------------------------------------------------------------------------------------------------------------------------------------------------------------------------------------------------------------------------------------------------------------------------------------------------------------------------------------------------------------------------------------|---------------|
|                                                              |                                                                                                                             | new (incident), users of the intervention are included in analyses.                                                                                                                                                                                                                                                                                                                                                                         |               |
|                                                              | 2.5 If N/PN to 2.4:<br><br>Were adjustment techniques used that are likely to correct for the presence of selection biases? | It is in principle possible to correct for selection biases, for example by using inverse probability weights to create a pseudo-population in which the selection bias has been removed, or by modelling the distributions of the missing participants or follow up times and outcome events and including them using missing data methodology. However such methods are rarely used and the answer to this question will usually be “No”. | Y/PY/PN/N     |
|                                                              |                                                                                                                             |                                                                                                                                                                                                                                                                                                                                                                                                                                             | Risk of bias: |
| Domain 3. Bias in classification of interventions            | 3.1 There was a previous clearly defined intervention?                                                                      | Judge whether the intervention is sufficiently defined                                                                                                                                                                                                                                                                                                                                                                                      | Y/PY/PN/N     |
|                                                              | 3.2 The inclusion and exclusion criteria for participants were clearly defined?                                             | Judge if inclusion and exclusion criteria are sufficiently defined                                                                                                                                                                                                                                                                                                                                                                          | Y/PY/PN/N     |
|                                                              | 3.3 Could classification of intervention status have been affected by knowledge of the outcome or risk of the outcome?      |                                                                                                                                                                                                                                                                                                                                                                                                                                             | Y/PY/PN/N     |
|                                                              |                                                                                                                             |                                                                                                                                                                                                                                                                                                                                                                                                                                             | Risk of bias: |
| Domain 4. Bias due to deviations from intended interventions | 4.1 Were there deviations from the intended intervention beyond what would be expected in usual practice?                   | Deviations that happen in usual practice following the intervention (for example, cessation of a drug intervention because of acute toxicity) are part of the intended intervention and therefore do not lead to bias in the effect of assignment to intervention.                                                                                                                                                                          | Y/PY/PN/N     |

|                                    |                                                                                                                        |                                                                                                                                                                                                                                                                                                                                                                                                                                                                                    |               |
|------------------------------------|------------------------------------------------------------------------------------------------------------------------|------------------------------------------------------------------------------------------------------------------------------------------------------------------------------------------------------------------------------------------------------------------------------------------------------------------------------------------------------------------------------------------------------------------------------------------------------------------------------------|---------------|
|                                    | 4.2 If Y/PY to 4.1: Were these deviations balanced in all the intervention group?                                      | If deviations appeared, were homogeneous for all the intervention group?                                                                                                                                                                                                                                                                                                                                                                                                           | Y/PY/PN/N     |
|                                    |                                                                                                                        |                                                                                                                                                                                                                                                                                                                                                                                                                                                                                    | Risk of bias: |
| Domain 5. Bias due to missing data | 5.1 Were outcome data available for all, or nearly all, participants?                                                  | “Nearly all” should be interpreted as “enough to be confident of the findings”, and a suitable proportion depends on the context. In some situations, availability of data from 95% (or possibly 90%) of the participants may be sufficient, providing that events of interest are reasonably common in both intervention groups. One aspect of this is that review authors would ideally try and locate an analysis plan for the study.                                           | Y/PY/PN/N     |
|                                    | 5.2 Were participants excluded due to missing data on intervention status?                                             | Missing intervention status may be a problem. This requires that the intended study sample is clear, which it may not be in practice.                                                                                                                                                                                                                                                                                                                                              | Y/PY/PN/N     |
|                                    | 5.3 Were participants excluded due to missing data on other variables needed for the analysis?                         | This question relates particularly to participants excluded from the analysis because of missing information on confounders that were controlled for in the analysis.                                                                                                                                                                                                                                                                                                              | Y/PY/PN/N     |
|                                    | 5.5 If PN/N to 5.1, or Y/PY to 5.2 or 5.3: Is there evidence that results were robust to the presence of missing data? | Evidence for robustness may come from how missing data were handled in the analysis and whether sensitivity analyses were performed by the investigators, or occasionally from additional analyses performed by the systematic reviewers. It is important to assess whether assumptions employed in analyses are clear and plausible. Both content knowledge and statistical expertise will often be required for this. For instance, use of a statistical method such as multiple | Y/PY/PN/N     |

|                                           |                                                                                               |                                                                                                                                                                                                                                                                                                                                                                                                                                                                                                                                                                                                                         |               |
|-------------------------------------------|-----------------------------------------------------------------------------------------------|-------------------------------------------------------------------------------------------------------------------------------------------------------------------------------------------------------------------------------------------------------------------------------------------------------------------------------------------------------------------------------------------------------------------------------------------------------------------------------------------------------------------------------------------------------------------------------------------------------------------------|---------------|
|                                           |                                                                                               | imputation does not guarantee an appropriate answer. Review authors should seek naïve (complete-case) analyses for comparison, and clear differences between complete-case and multiple imputation-based findings should lead to careful assessment of the validity of the methods used.                                                                                                                                                                                                                                                                                                                                |               |
|                                           |                                                                                               |                                                                                                                                                                                                                                                                                                                                                                                                                                                                                                                                                                                                                         | Risk of bias: |
| Domain 6. Bias in measurement of outcomes | 6.1 Could the outcome measure have been influenced by knowledge of the intervention received? | Some outcome measures involve negligible assessor judgment, e.g. all-cause mortality or non-repeatable automated laboratory assessments. Risk of bias due to measurement of these outcomes would be expected to be low.                                                                                                                                                                                                                                                                                                                                                                                                 | Y/PY/PN/N     |
|                                           | 6.2 Were outcome assessors aware of the intervention received by study participants?          | If outcome assessors were blinded to intervention status, the answer to this question would be 'No'. In other situations, outcome assessors may be unaware of the interventions being received by participants despite there being no active blinding by the study investigators; the answer this question would then also be 'No'. In studies where participants report their outcomes themselves, for example in a questionnaire, the outcome assessor is the study participant. In an observational study, the answer to this question will usually be 'Yes' when the participants report their outcomes themselves. | Y/PY/PN/N     |
|                                           | 6.3 Were comparable methods before and after the intervention?                                | Comparable assessment methods (i.e. data collection) would involve the same outcome detection methods and thresholds, same time point, same definition, and same measurements.                                                                                                                                                                                                                                                                                                                                                                                                                                          | Y/PY/PN/N     |

|                                                    |                                                                                                                                                                      |                                                                                                                                                                                                                                                                                                                                                                                                                                                                                                                                                                                                                                                       |               |
|----------------------------------------------------|----------------------------------------------------------------------------------------------------------------------------------------------------------------------|-------------------------------------------------------------------------------------------------------------------------------------------------------------------------------------------------------------------------------------------------------------------------------------------------------------------------------------------------------------------------------------------------------------------------------------------------------------------------------------------------------------------------------------------------------------------------------------------------------------------------------------------------------|---------------|
|                                                    | 6.4 Were any systematic errors in measurement of the outcome related to intervention received?                                                                       | This question refers to differential misclassification of outcomes. Systematic errors in measuring the outcome, if present, could cause bias if they are related to intervention or to a confounder of the intervention-outcome relationship. This will usually be due either to outcome assessors being aware of the intervention received or to non-comparability of outcome assessment methods, but there are examples of differential misclassification arising despite these controls being in place.                                                                                                                                            | Y/PY/PN/N     |
|                                                    |                                                                                                                                                                      |                                                                                                                                                                                                                                                                                                                                                                                                                                                                                                                                                                                                                                                       | Risk of bias: |
| Domain 7. Bias in selection of the reported result | Is the reported effect estimate likely to be selected, on the basis of the results, from...<br><br>7.1. ... multiple outcome measurements within the outcome domain? | For a specified outcome domain, it is possible to generate multiple effect estimates for different measurements. If multiple measurements were made, but only one or a subset is reported, there is a risk of selective reporting on the basis of results.                                                                                                                                                                                                                                                                                                                                                                                            | Y/PY/PN/N     |
|                                                    | 7.2 ... multiple analyses of the intervention outcome relationship?                                                                                                  | Because of the limitations of using data from non-randomized studies for analyses of effectiveness (need to control confounding, substantial missing data, etc), analysts may implement different analytic methods to address these limitations. Examples include unadjusted and adjusted models; use of final value vs change from baseline vs analysis of covariance; different transformations of variables; a continuously scaled outcome converted to categorical data with different cut-points; different sets of covariates used for adjustment; and different analytic strategies for dealing with missing data. Application of such methods | Y/PY/PN/N     |



|  |                              |                                                                                                                                                                                                                                                                                                                                                                 |               |
|--|------------------------------|-----------------------------------------------------------------------------------------------------------------------------------------------------------------------------------------------------------------------------------------------------------------------------------------------------------------------------------------------------------------|---------------|
|  |                              | generates multiple estimates of the effect of the intervention versus the comparator on the outcome. If the analyst does not pre-specify the methods to be applied, and multiple estimates are generated but only one or a subset is reported, there is a risk of selective reporting on the basis of results.                                                  |               |
|  | 7.3 ... different subgroups? | Particularly with large cohorts often available from routine data sources, it is possible to generate multiple effect estimates for different subgroups or simply to omit varying proportions of the original cohort. If multiple estimates are generated but only one or a subset is reported, there is a risk of selective reporting on the basis of results. | Y/PY/PN/N     |
|  |                              |                                                                                                                                                                                                                                                                                                                                                                 | Risk of bias: |

**Table S3. Assessment of Risk of bias (RoB) in Randomized controlled trial studies.**

Outcome assessment: All-cause mortality

Outcome assessment: Hospitalizations for heart failure

|                  | Random sequence generation (selection bias) | Deviations from the intended intervention | Incomplete outcome data (attrition bias) | Bias measuring the outcome | Selection reporting result (reporting bias) |
|------------------|---------------------------------------------|-------------------------------------------|------------------------------------------|----------------------------|---------------------------------------------|
| De la Porte 2007 | ?                                           | ?                                         | +                                        | +                          | ?                                           |
| Ekman 1998       | +                                           | +                                         | +                                        | +                          | +                                           |
| Goldberg 2003    | -                                           | ?                                         | +                                        | +                          | ?                                           |
| Lynga 2012       | -                                           | +                                         | +                                        | +                          | ?                                           |
| McDonald 2001    | -                                           | -                                         | -                                        | -                          | ?                                           |
| Rogers 2017      | ?                                           | +                                         | +                                        | +                          | ?                                           |
| Smith 2015       | +                                           | +                                         | +                                        | +                          | +                                           |

|                  | Random sequence generation (selection bias) | Deviations from the intended intervention | Incomplete outcome data (attrition bias) | Bias measuring the outcome | Selection reporting result (reporting bias) |
|------------------|---------------------------------------------|-------------------------------------------|------------------------------------------|----------------------------|---------------------------------------------|
| Boyne 2012       | ?                                           | +                                         | -                                        | +                          | +                                           |
| Comin-Colet 2015 | +                                           | +                                         | +                                        | +                          | ?                                           |
| De la Porte 2007 | ?                                           | ?                                         | -                                        | +                          | ?                                           |
| Ekman 1998       | +                                           | +                                         | +                                        | +                          | +                                           |
| GESICA 2005      | +                                           | +                                         | +                                        | +                          | +                                           |
| Goldberg 2003    | -                                           | ?                                         | +                                        | +                          | ?                                           |
| Jaarsma 1999     | -                                           | -                                         | +                                        | -                          | +                                           |
| Lynga 2012       | -                                           | +                                         | +                                        | +                          | ?                                           |
| McDonald 2001    | -                                           | -                                         | -                                        | -                          | ?                                           |
| Rogers 2017      | ?                                           | +                                         | -                                        | +                          | ?                                           |
| Smith 2015       | +                                           | +                                         | +                                        | +                          | +                                           |

Outcome assessment: All-cause hospitalizations

|                 | Random sequence generation (selection bias) | Deviations from the intended intervention | Incomplete outcome data (attrition bias) | Bias measuring the outcome | Selection reporting result (reporting bias) |
|-----------------|---------------------------------------------|-------------------------------------------|------------------------------------------|----------------------------|---------------------------------------------|
| Aiken 2006      | +                                           | +                                         | -                                        | -                          | -                                           |
| Brännström 2014 | ?                                           | +                                         | ?                                        | ?                          | -                                           |
| Ekman 1998      | +                                           | +                                         | +                                        | +                          | +                                           |
| Goldberg 2003   | -                                           | ?                                         | +                                        | +                          | ?                                           |
| Jaarsma 1999    | -                                           | -                                         | +                                        | -                          | +                                           |
| Lynga 2012      | -                                           | +                                         | +                                        | +                          | ?                                           |
| Ong 2016        | ?                                           | +                                         | -                                        | +                          | +                                           |
| Yuet 2016       | -                                           | +                                         | -                                        | +                          | ?                                           |

Outcome assessment: Quality of life

|                  | Random sequence generation (selection bias) | Deviations from the intended intervention | Incomplete outcome data (attrition bias) | Bias measuring the outcome | Selection reporting result (reporting bias) |
|------------------|---------------------------------------------|-------------------------------------------|------------------------------------------|----------------------------|---------------------------------------------|
| Aiken 2006       | +                                           | +                                         | +                                        | -                          | -                                           |
| Bondmass 2007    | -                                           | +                                         | +                                        | -                          | ?                                           |
| Brännström 2014  | ?                                           | +                                         | -                                        | -                          | -                                           |
| De la Porte 2007 | ?                                           | ?                                         | -                                        | -                          | ?                                           |
| Goldberg 2003    | -                                           | ?                                         | -                                        | -                          | ?                                           |
| Jaarsma 2000     | -                                           | -                                         | +                                        | -                          | +                                           |
| Man 2017         | +                                           | +                                         | +                                        | -                          | +                                           |
| Rogers 2017      | ?                                           | +                                         | -                                        | -                          | ?                                           |
| Yuet 2016        | -                                           | +                                         | -                                        | -                          | ?                                           |

Outcome assessment: Self-care

|                  | Random sequence generation (selection bias) | Deviations from the intended intervention | Incomplete outcome data (attrition bias) | Bias measuring the outcome | Selection reporting result (reporting bias) |
|------------------|---------------------------------------------|-------------------------------------------|------------------------------------------|----------------------------|---------------------------------------------|
| De la Porte 2007 | ?                                           | ?                                         | -                                        | -                          | ?                                           |
| Jaarsma 2000     | -                                           | -                                         | +                                        | -                          | +                                           |
| Zamanzadeh 2013  | ?                                           | +                                         | +                                        | -                          | ?                                           |

Table S4. Assessment of Risk of bias with adaptation ROBINS-I tool in non-Randomized controlled trial studies.

Outcome assessment: Hospitalizations for heart failure

|              | Bias due to confounding | Bias in selection of participants into the study | Bias in classification of interventions | Bias due to deviations from intended treatment | Bias due to missing data | Bias in measurement of outcomes | Bias in selection of the reported result |
|--------------|-------------------------|--------------------------------------------------|-----------------------------------------|------------------------------------------------|--------------------------|---------------------------------|------------------------------------------|
| Delaney 2010 | Moderate                | Moderate                                         | Low                                     | Moderate                                       | Low                      | Moderate                        | Low                                      |
| Fonarow 1997 | Low                     | Low                                              | Low                                     | Low                                            | Moderate                 | Low                             | Moderate                                 |

 Critical

 Serious

 Moderate

 Low

Outcome assessment: All-cause hospitalizations

|                   | Bias due to confounding                                                            | Bias in selection of participants into the study                                   | Bias in classification of interventions                                            | Bias due to deviations from intended interventions                                 | Bias due to missing data                                                           | Bias in measurement of outcomes                                                      | Bias in selection of the reported result                                             |
|-------------------|------------------------------------------------------------------------------------|------------------------------------------------------------------------------------|------------------------------------------------------------------------------------|------------------------------------------------------------------------------------|------------------------------------------------------------------------------------|--------------------------------------------------------------------------------------|--------------------------------------------------------------------------------------|
| Holst 2001        |   |   |   |   |   |   |   |
| Schellinger 2011  |   |   |   |   |   |   |   |
| Shah 1998         |   |   |   |   |   |   |   |
| Vavouranakis 2003 |  |  |  |  |  |  |  |

 Critical  Serious  Moderate  Low

Outcome assessment: Quality of life

|                   | Bias due to confounding | Bias in selection of participants into the study | Bias in classification of interventions | Bias due to deviations from intended interventions | Bias due to missing data | Bias in measurement of outcomes | Bias in selection of the reported result |
|-------------------|-------------------------|--------------------------------------------------|-----------------------------------------|----------------------------------------------------|--------------------------|---------------------------------|------------------------------------------|
| Delaney 2010      | Moderate                | Moderate                                         | Low                                     | Moderate                                           | Low                      | Moderate                        | Low                                      |
| Holst 2001        | Serious                 | Serious                                          | Low                                     | Moderate                                           | Moderate                 | Serious                         | Serious                                  |
| Vavouranakis 2003 | Moderate                | Serious                                          | Low                                     | Moderate                                           | Moderate                 | Serious                         | Serious                                  |

 Critical

 Serious

 Moderate

 Low

Figure S1. Meta-analysis of subgroups according follow-up time, type of nurse-led case management delivered and age.

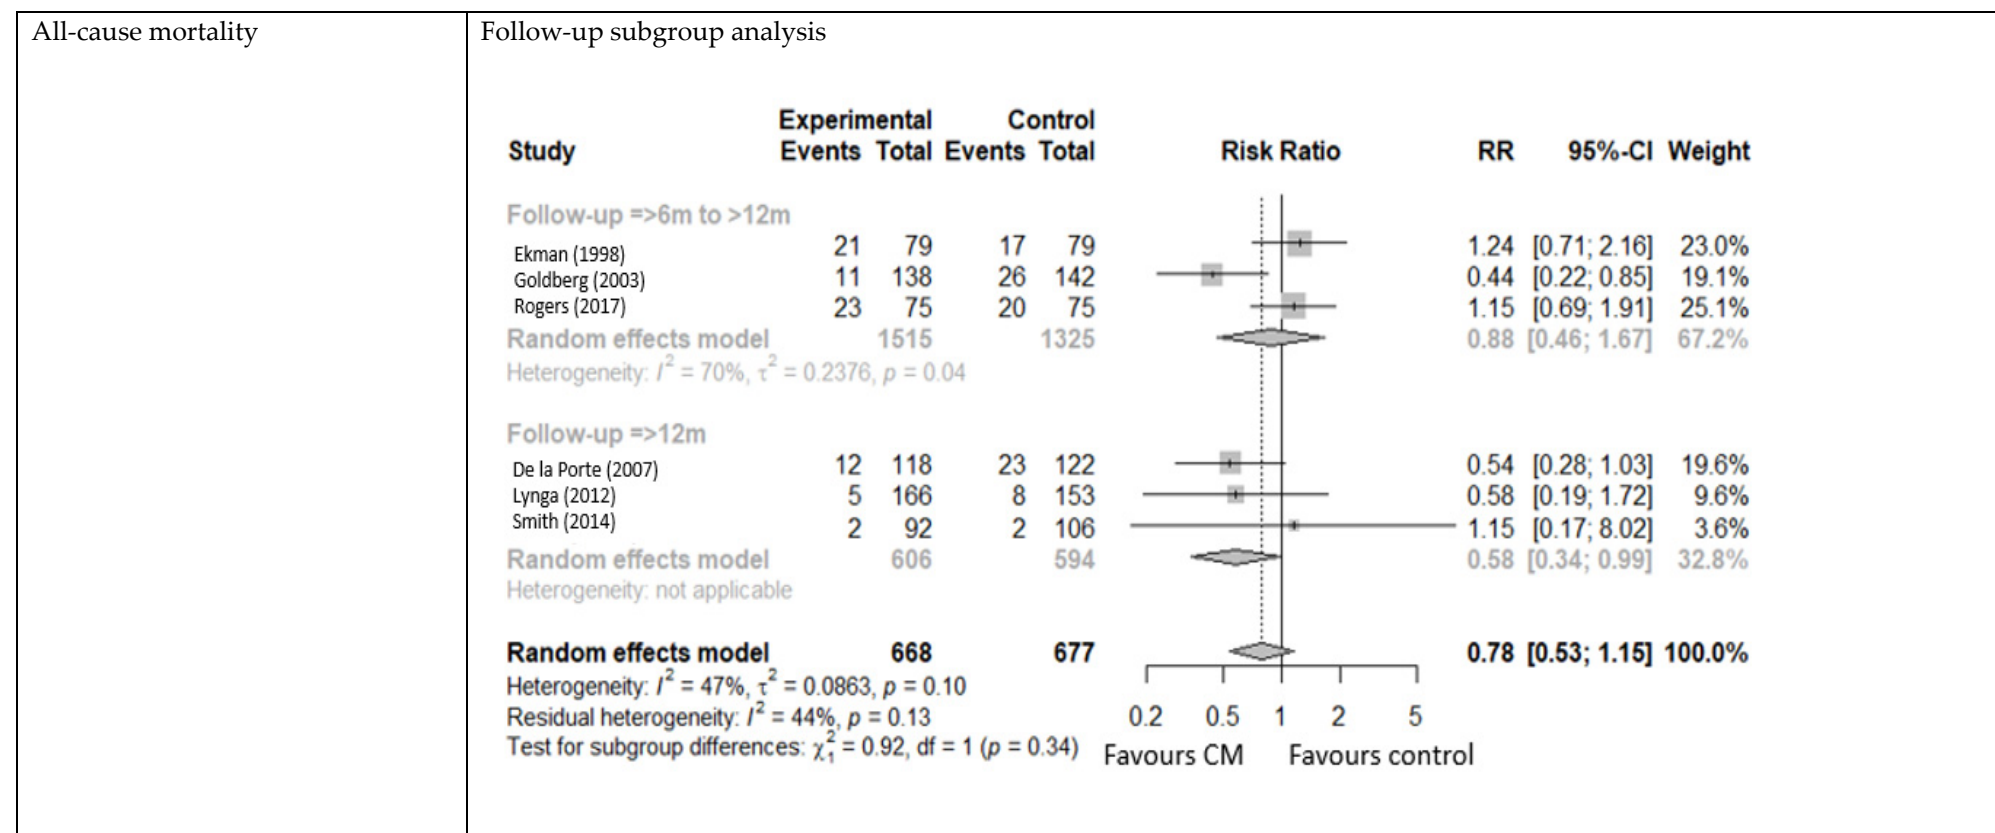

# Type of nurse-led case management delivered subgroup analysis

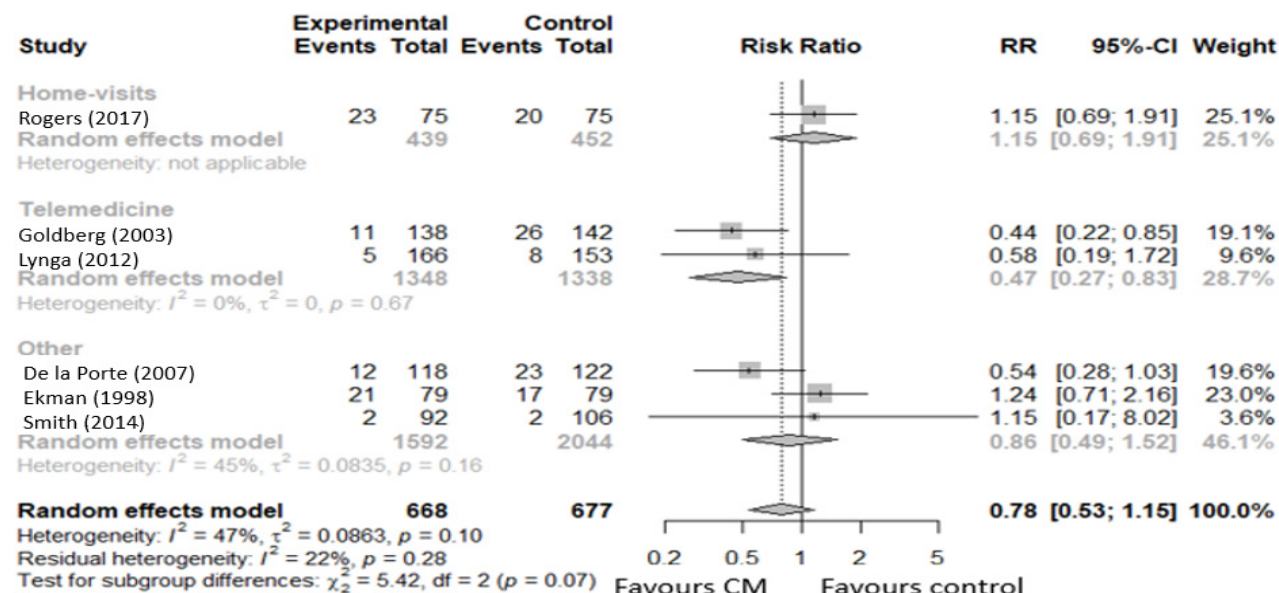



# Age subgroup analysis

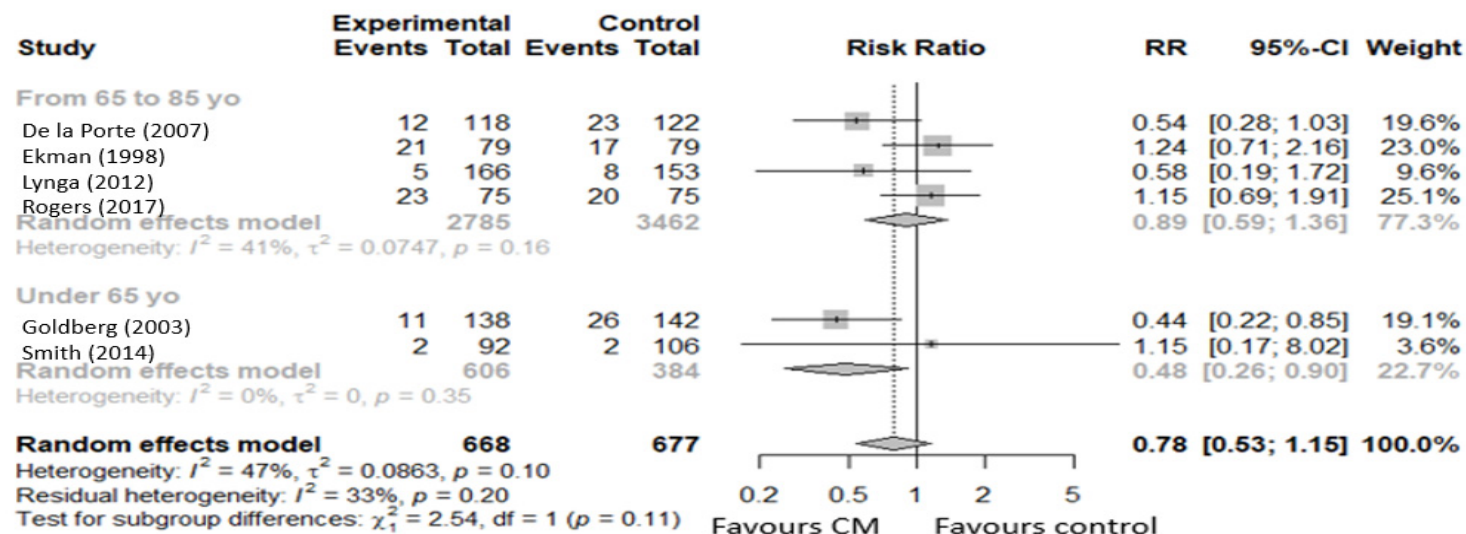

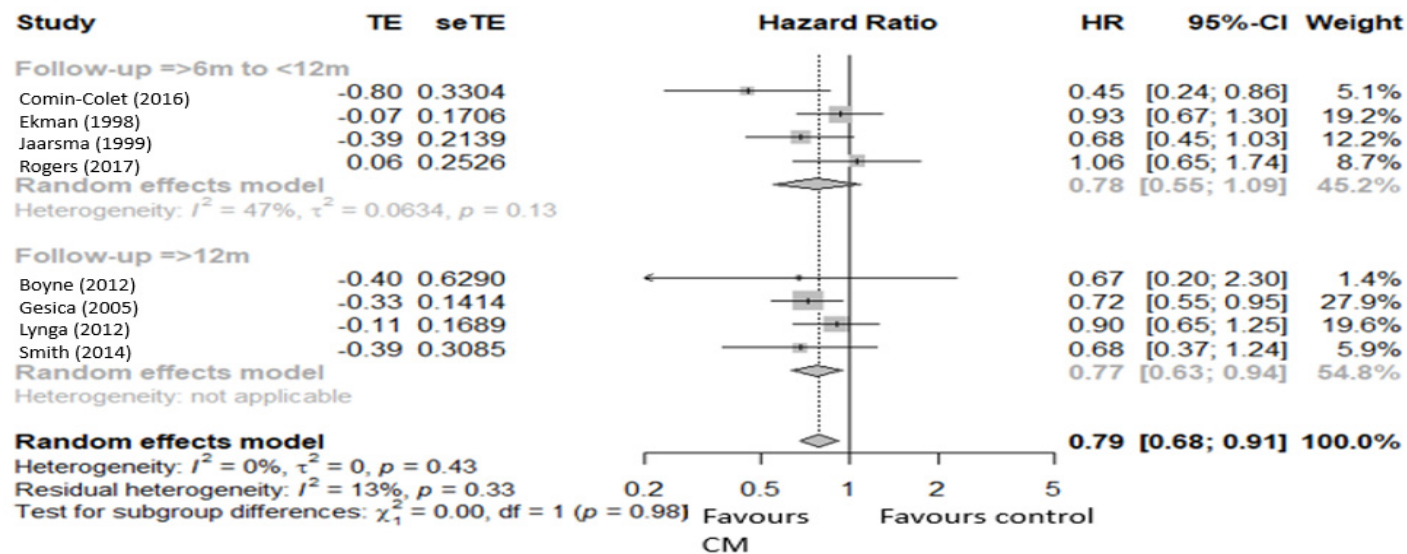

# Type of nurse-led case management delivered subgroup analysis

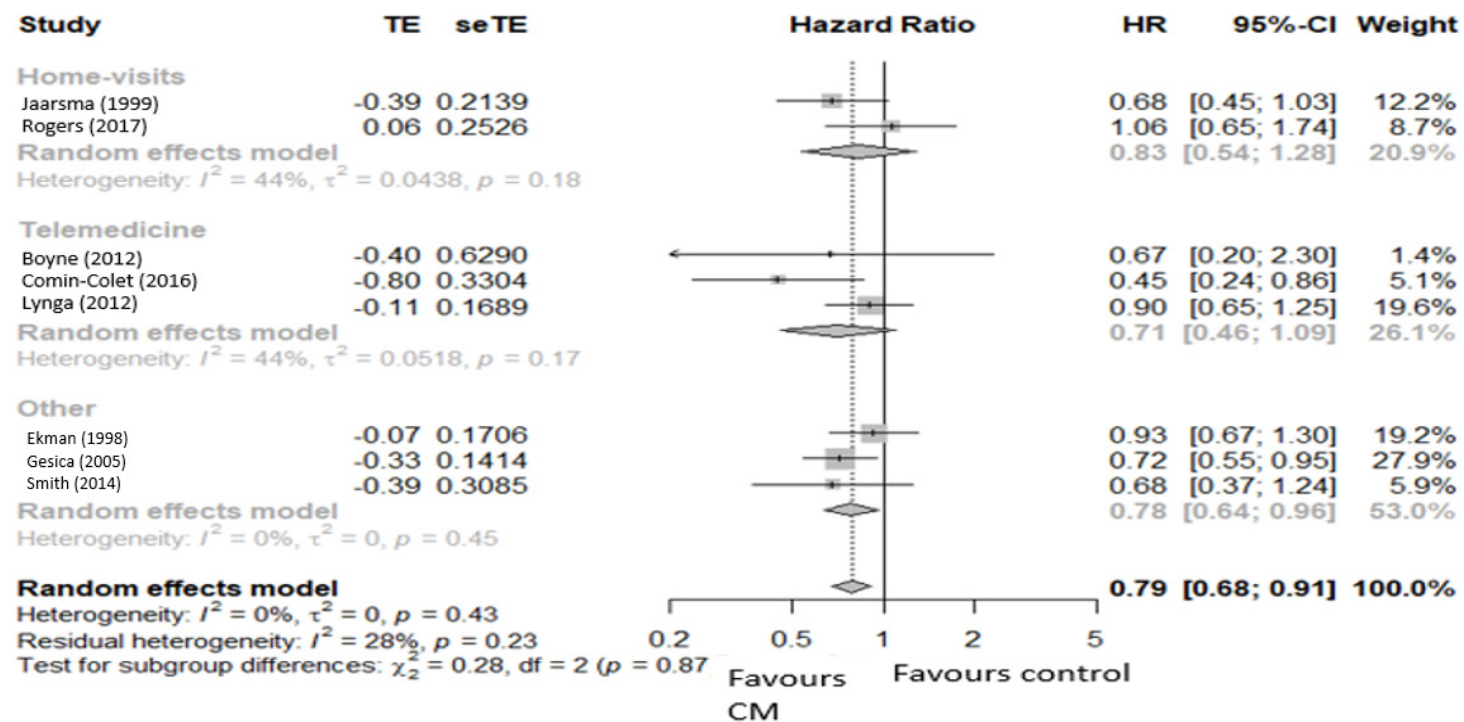

## Age subgroup analysis

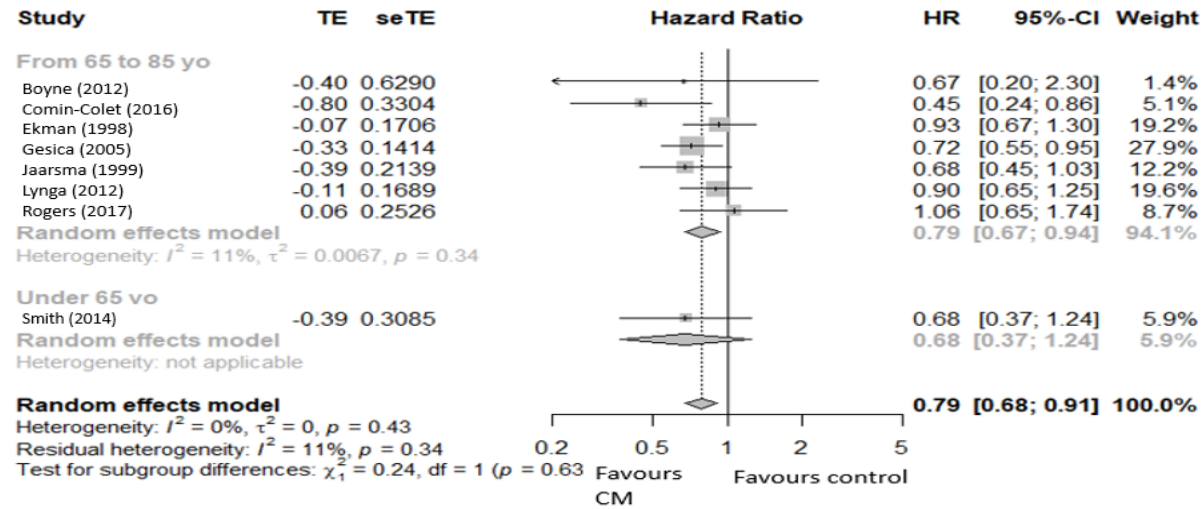

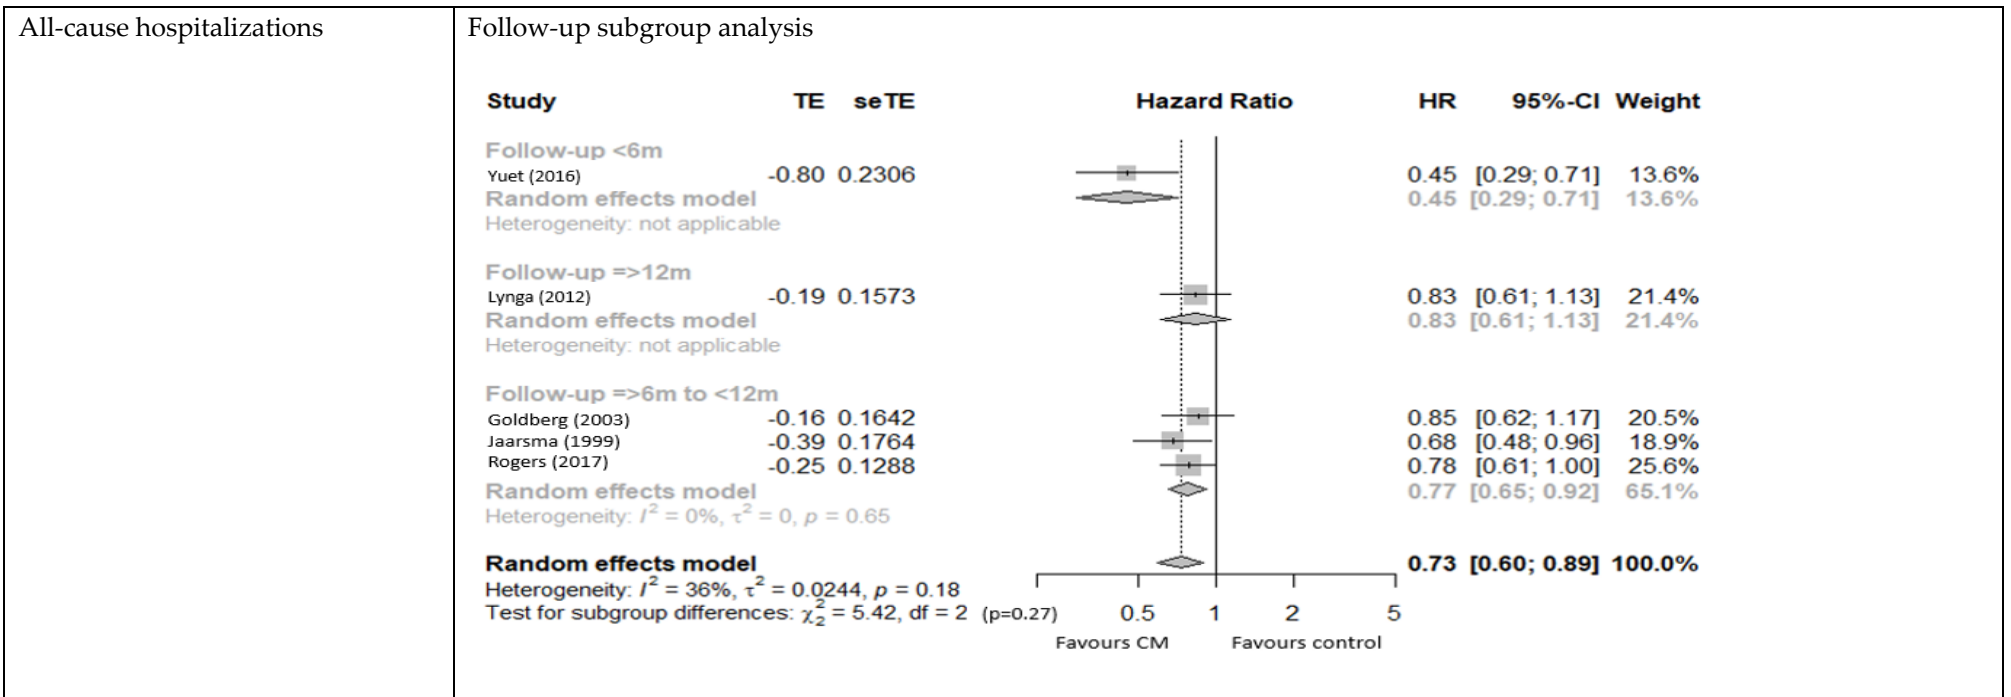

# Type of nurse-led case management delivered subgroup analysis

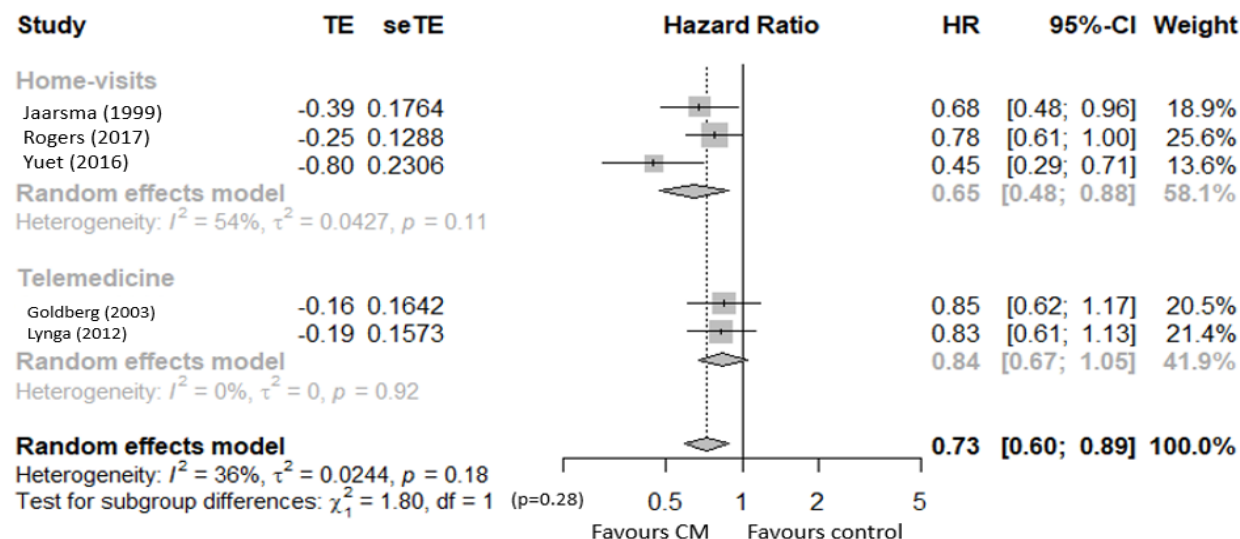

# Age subgroup analysis

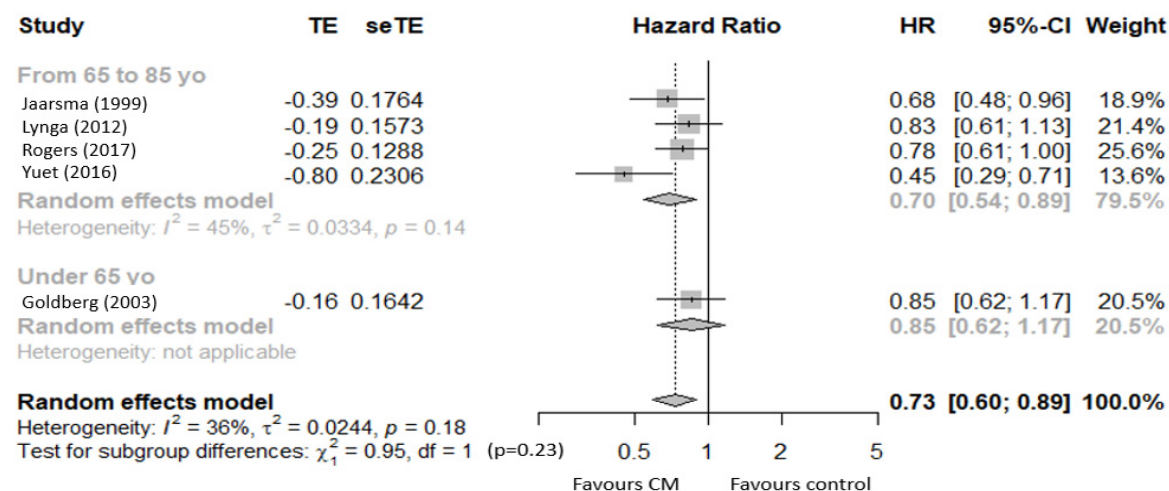

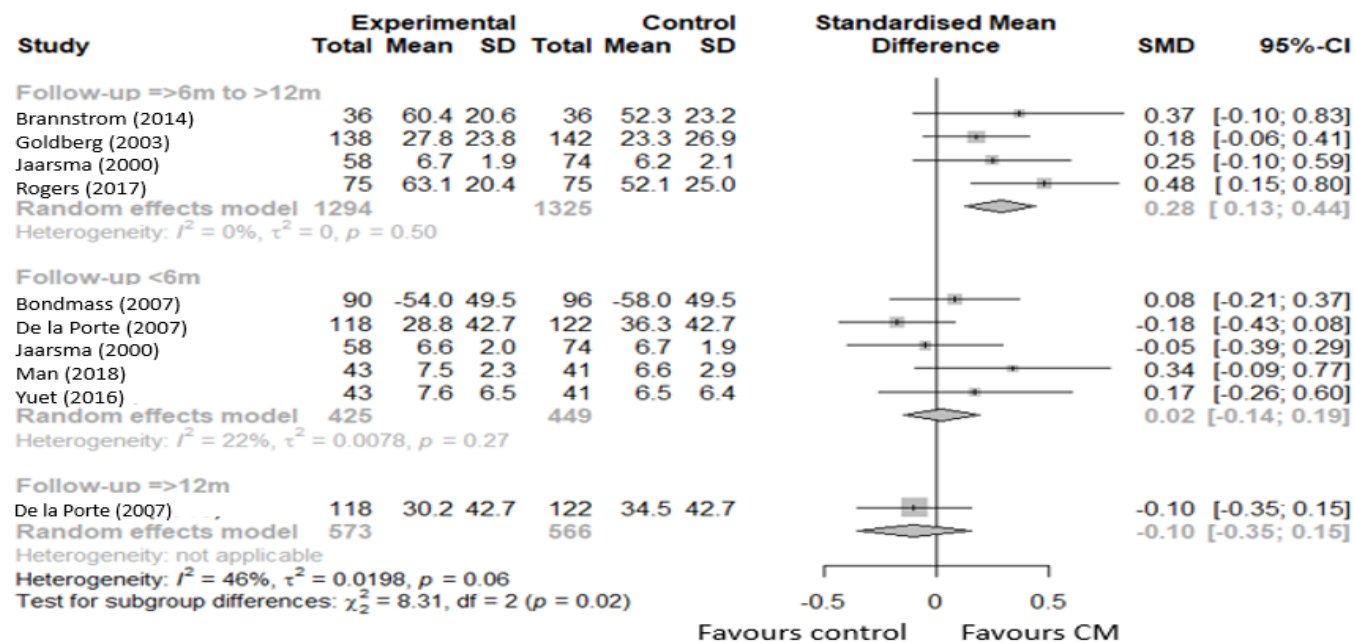

# Type of nurse-led case management delivered subgroup analysis

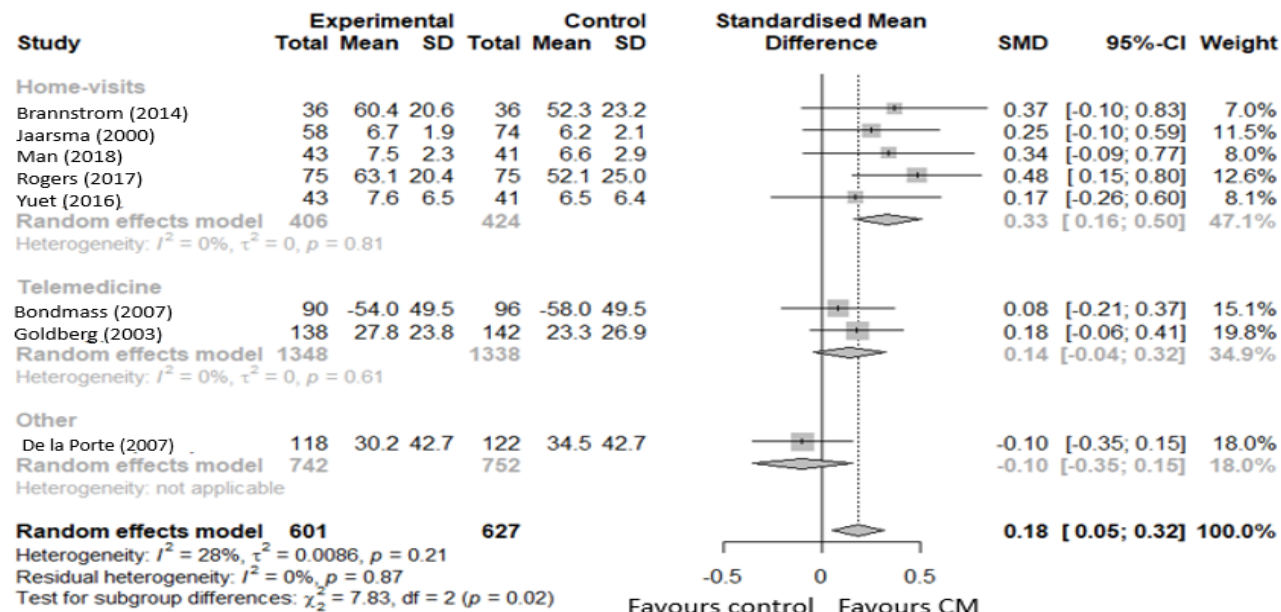



# Age subgroup analysis

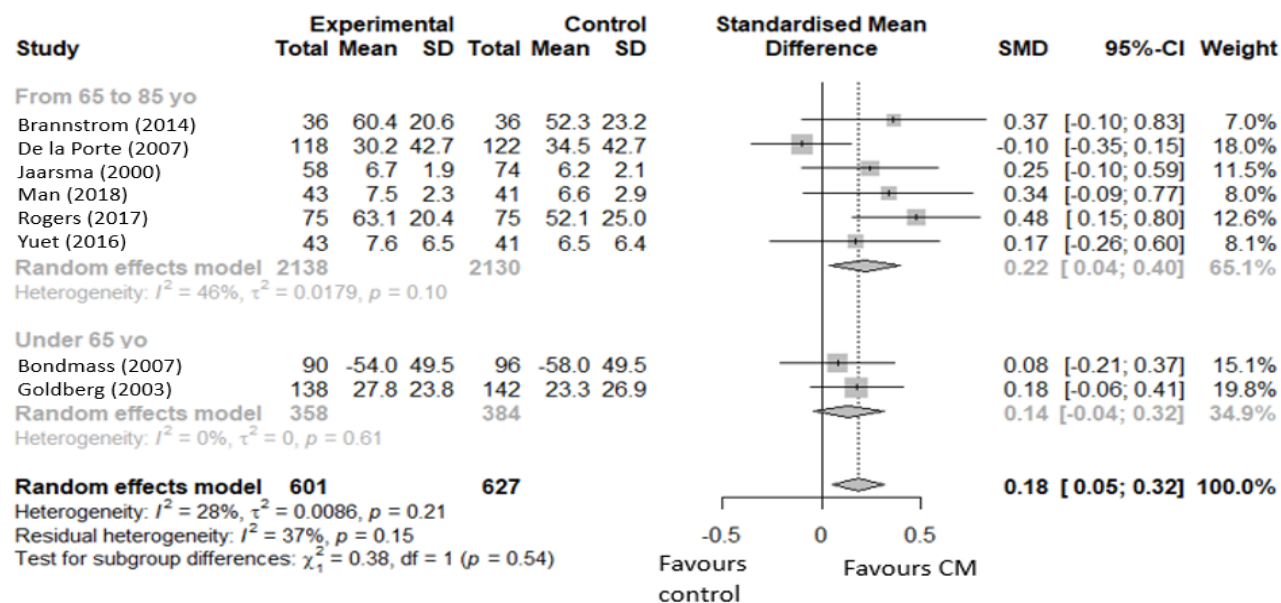

| Self-care                                                                   | Follow-up subgroup analysis                                                                                                                                                                                                                                                                                                                                                                                                                                                                                                                                                                                                                                                                                                                                                                                                                                                                                                                                                                                                                                                                                                                                                                                                                                                                                                                                                                                                                                                                                                                                                                                                                                                                                                                                                                                                                                                                                                                                                                                                                                                                                                        |       |                       |                  |      |                  |                                 |       |                                 |     |        |                                     |  |  |  |  |  |  |  |  |  |                |    |      |     |    |      |     |  |      |               |                      |      |  |  |      |  |  |  |      |               |                               |  |  |  |  |  |  |  |  |  |                         |  |  |  |  |  |  |  |  |  |                |    |      |     |    |      |     |  |      |              |                   |    |      |      |    |      |      |  |      |              |                      |     |  |  |     |  |  |  |      |               |                                                              |  |  |  |  |  |  |  |  |  |                           |  |  |  |  |  |  |  |  |  |                    |     |      |      |     |      |      |  |       |                |                      |     |  |  |     |  |  |  |       |                |                               |  |  |  |  |  |  |  |  |  |                                                              |  |  |  |  |  |  |  |  |  |                                                                             |  |  |  |  |  |  |  |  |  |
|-----------------------------------------------------------------------------|------------------------------------------------------------------------------------------------------------------------------------------------------------------------------------------------------------------------------------------------------------------------------------------------------------------------------------------------------------------------------------------------------------------------------------------------------------------------------------------------------------------------------------------------------------------------------------------------------------------------------------------------------------------------------------------------------------------------------------------------------------------------------------------------------------------------------------------------------------------------------------------------------------------------------------------------------------------------------------------------------------------------------------------------------------------------------------------------------------------------------------------------------------------------------------------------------------------------------------------------------------------------------------------------------------------------------------------------------------------------------------------------------------------------------------------------------------------------------------------------------------------------------------------------------------------------------------------------------------------------------------------------------------------------------------------------------------------------------------------------------------------------------------------------------------------------------------------------------------------------------------------------------------------------------------------------------------------------------------------------------------------------------------------------------------------------------------------------------------------------------------|-------|-----------------------|------------------|------|------------------|---------------------------------|-------|---------------------------------|-----|--------|-------------------------------------|--|--|--|--|--|--|--|--|--|----------------|----|------|-----|----|------|-----|--|------|---------------|----------------------|------|--|--|------|--|--|--|------|---------------|-------------------------------|--|--|--|--|--|--|--|--|--|-------------------------|--|--|--|--|--|--|--|--|--|----------------|----|------|-----|----|------|-----|--|------|--------------|-------------------|----|------|------|----|------|------|--|------|--------------|----------------------|-----|--|--|-----|--|--|--|------|---------------|--------------------------------------------------------------|--|--|--|--|--|--|--|--|--|---------------------------|--|--|--|--|--|--|--|--|--|--------------------|-----|------|------|-----|------|------|--|-------|----------------|----------------------|-----|--|--|-----|--|--|--|-------|----------------|-------------------------------|--|--|--|--|--|--|--|--|--|--------------------------------------------------------------|--|--|--|--|--|--|--|--|--|-----------------------------------------------------------------------------|--|--|--|--|--|--|--|--|--|
|                                                                             | <table><tr><th>Study</th><th>Experimental<br/>Total</th><th>Mean</th><th>SD</th><th>Control<br/>Total</th><th>Mean</th><th>SD</th><th>Standardised Mean<br/>Difference</th><th>SMD</th><th>95%-CI</th></tr><tr><td colspan="10"><b>Follow-up =&gt;6m to &lt;12m</b></td></tr><tr><td>Jaarsma (2000)</td><td>58</td><td>11.2</td><td>3.1</td><td>74</td><td>10.3</td><td>2.8</td><td></td><td>0.30</td><td>[-0.04; 0.65]</td></tr><tr><td>Random effects model</td><td>1294</td><td></td><td></td><td>1325</td><td></td><td></td><td></td><td>0.30</td><td>[-0.04; 0.65]</td></tr><tr><td colspan="10">Heterogeneity: not applicable</td></tr><tr><td colspan="10"><b>Follow-up &lt;6m</b></td></tr><tr><td>Jaarsma (2000)</td><td>58</td><td>12.2</td><td>3.1</td><td>74</td><td>10.6</td><td>3.2</td><td></td><td>0.50</td><td>[0.15; 0.85]</td></tr><tr><td>Zamanzadeh (2013)</td><td>38</td><td>66.5</td><td>15.3</td><td>40</td><td>30.3</td><td>17.6</td><td></td><td>2.17</td><td>[1.60; 2.73]</td></tr><tr><td>Random effects model</td><td>307</td><td></td><td></td><td>327</td><td></td><td></td><td></td><td>1.32</td><td>[-0.31; 2.95]</td></tr><tr><td colspan="10">Heterogeneity: <math>I^2 = 96\%</math>, <math>\tau^2 = 1.3297</math>, <math>p &lt; 0.01</math></td></tr><tr><td colspan="10"><b>Follow-up =&gt;12m</b></td></tr><tr><td>De la Porte (2007)</td><td>118</td><td>23.8</td><td>14.9</td><td>122</td><td>30.2</td><td>14.9</td><td></td><td>-0.43</td><td>[-0.68; -0.17]</td></tr><tr><td>Random effects model</td><td>953</td><td></td><td></td><td>936</td><td></td><td></td><td></td><td>-0.43</td><td>[-0.68; -0.17]</td></tr><tr><td colspan="10">Heterogeneity: not applicable</td></tr><tr><td colspan="10">Heterogeneity: <math>I^2 = 96\%</math>, <math>\tau^2 = 1.1441</math>, <math>p &lt; 0.01</math></td></tr><tr><td colspan="10">Test for subgroup differences: <math>\chi^2_2 = 14.33</math>, <math>df = 2</math> (<math>p &lt; 0.01</math>)</td></tr></table> <p style="text-align: center;">-2   -1   0   1   2</p> <p style="text-align: center;">Favours control   Favours CM</p> | Study | Experimental<br>Total | Mean             | SD   | Control<br>Total | Mean                            | SD    | Standardised Mean<br>Difference | SMD | 95%-CI | <b>Follow-up =&gt;6m to &lt;12m</b> |  |  |  |  |  |  |  |  |  | Jaarsma (2000) | 58 | 11.2 | 3.1 | 74 | 10.3 | 2.8 |  | 0.30 | [-0.04; 0.65] | Random effects model | 1294 |  |  | 1325 |  |  |  | 0.30 | [-0.04; 0.65] | Heterogeneity: not applicable |  |  |  |  |  |  |  |  |  | <b>Follow-up &lt;6m</b> |  |  |  |  |  |  |  |  |  | Jaarsma (2000) | 58 | 12.2 | 3.1 | 74 | 10.6 | 3.2 |  | 0.50 | [0.15; 0.85] | Zamanzadeh (2013) | 38 | 66.5 | 15.3 | 40 | 30.3 | 17.6 |  | 2.17 | [1.60; 2.73] | Random effects model | 307 |  |  | 327 |  |  |  | 1.32 | [-0.31; 2.95] | Heterogeneity: $I^2 = 96\%$ , $\tau^2 = 1.3297$ , $p < 0.01$ |  |  |  |  |  |  |  |  |  | <b>Follow-up =&gt;12m</b> |  |  |  |  |  |  |  |  |  | De la Porte (2007) | 118 | 23.8 | 14.9 | 122 | 30.2 | 14.9 |  | -0.43 | [-0.68; -0.17] | Random effects model | 953 |  |  | 936 |  |  |  | -0.43 | [-0.68; -0.17] | Heterogeneity: not applicable |  |  |  |  |  |  |  |  |  | Heterogeneity: $I^2 = 96\%$ , $\tau^2 = 1.1441$ , $p < 0.01$ |  |  |  |  |  |  |  |  |  | Test for subgroup differences: $\chi^2_2 = 14.33$ , $df = 2$ ( $p < 0.01$ ) |  |  |  |  |  |  |  |  |  |
| Study                                                                       | Experimental<br>Total                                                                                                                                                                                                                                                                                                                                                                                                                                                                                                                                                                                                                                                                                                                                                                                                                                                                                                                                                                                                                                                                                                                                                                                                                                                                                                                                                                                                                                                                                                                                                                                                                                                                                                                                                                                                                                                                                                                                                                                                                                                                                                              | Mean  | SD                    | Control<br>Total | Mean | SD               | Standardised Mean<br>Difference | SMD   | 95%-CI                          |     |        |                                     |  |  |  |  |  |  |  |  |  |                |    |      |     |    |      |     |  |      |               |                      |      |  |  |      |  |  |  |      |               |                               |  |  |  |  |  |  |  |  |  |                         |  |  |  |  |  |  |  |  |  |                |    |      |     |    |      |     |  |      |              |                   |    |      |      |    |      |      |  |      |              |                      |     |  |  |     |  |  |  |      |               |                                                              |  |  |  |  |  |  |  |  |  |                           |  |  |  |  |  |  |  |  |  |                    |     |      |      |     |      |      |  |       |                |                      |     |  |  |     |  |  |  |       |                |                               |  |  |  |  |  |  |  |  |  |                                                              |  |  |  |  |  |  |  |  |  |                                                                             |  |  |  |  |  |  |  |  |  |
| <b>Follow-up =&gt;6m to &lt;12m</b>                                         |                                                                                                                                                                                                                                                                                                                                                                                                                                                                                                                                                                                                                                                                                                                                                                                                                                                                                                                                                                                                                                                                                                                                                                                                                                                                                                                                                                                                                                                                                                                                                                                                                                                                                                                                                                                                                                                                                                                                                                                                                                                                                                                                    |       |                       |                  |      |                  |                                 |       |                                 |     |        |                                     |  |  |  |  |  |  |  |  |  |                |    |      |     |    |      |     |  |      |               |                      |      |  |  |      |  |  |  |      |               |                               |  |  |  |  |  |  |  |  |  |                         |  |  |  |  |  |  |  |  |  |                |    |      |     |    |      |     |  |      |              |                   |    |      |      |    |      |      |  |      |              |                      |     |  |  |     |  |  |  |      |               |                                                              |  |  |  |  |  |  |  |  |  |                           |  |  |  |  |  |  |  |  |  |                    |     |      |      |     |      |      |  |       |                |                      |     |  |  |     |  |  |  |       |                |                               |  |  |  |  |  |  |  |  |  |                                                              |  |  |  |  |  |  |  |  |  |                                                                             |  |  |  |  |  |  |  |  |  |
| Jaarsma (2000)                                                              | 58                                                                                                                                                                                                                                                                                                                                                                                                                                                                                                                                                                                                                                                                                                                                                                                                                                                                                                                                                                                                                                                                                                                                                                                                                                                                                                                                                                                                                                                                                                                                                                                                                                                                                                                                                                                                                                                                                                                                                                                                                                                                                                                                 | 11.2  | 3.1                   | 74               | 10.3 | 2.8              |                                 | 0.30  | [-0.04; 0.65]                   |     |        |                                     |  |  |  |  |  |  |  |  |  |                |    |      |     |    |      |     |  |      |               |                      |      |  |  |      |  |  |  |      |               |                               |  |  |  |  |  |  |  |  |  |                         |  |  |  |  |  |  |  |  |  |                |    |      |     |    |      |     |  |      |              |                   |    |      |      |    |      |      |  |      |              |                      |     |  |  |     |  |  |  |      |               |                                                              |  |  |  |  |  |  |  |  |  |                           |  |  |  |  |  |  |  |  |  |                    |     |      |      |     |      |      |  |       |                |                      |     |  |  |     |  |  |  |       |                |                               |  |  |  |  |  |  |  |  |  |                                                              |  |  |  |  |  |  |  |  |  |                                                                             |  |  |  |  |  |  |  |  |  |
| Random effects model                                                        | 1294                                                                                                                                                                                                                                                                                                                                                                                                                                                                                                                                                                                                                                                                                                                                                                                                                                                                                                                                                                                                                                                                                                                                                                                                                                                                                                                                                                                                                                                                                                                                                                                                                                                                                                                                                                                                                                                                                                                                                                                                                                                                                                                               |       |                       | 1325             |      |                  |                                 | 0.30  | [-0.04; 0.65]                   |     |        |                                     |  |  |  |  |  |  |  |  |  |                |    |      |     |    |      |     |  |      |               |                      |      |  |  |      |  |  |  |      |               |                               |  |  |  |  |  |  |  |  |  |                         |  |  |  |  |  |  |  |  |  |                |    |      |     |    |      |     |  |      |              |                   |    |      |      |    |      |      |  |      |              |                      |     |  |  |     |  |  |  |      |               |                                                              |  |  |  |  |  |  |  |  |  |                           |  |  |  |  |  |  |  |  |  |                    |     |      |      |     |      |      |  |       |                |                      |     |  |  |     |  |  |  |       |                |                               |  |  |  |  |  |  |  |  |  |                                                              |  |  |  |  |  |  |  |  |  |                                                                             |  |  |  |  |  |  |  |  |  |
| Heterogeneity: not applicable                                               |                                                                                                                                                                                                                                                                                                                                                                                                                                                                                                                                                                                                                                                                                                                                                                                                                                                                                                                                                                                                                                                                                                                                                                                                                                                                                                                                                                                                                                                                                                                                                                                                                                                                                                                                                                                                                                                                                                                                                                                                                                                                                                                                    |       |                       |                  |      |                  |                                 |       |                                 |     |        |                                     |  |  |  |  |  |  |  |  |  |                |    |      |     |    |      |     |  |      |               |                      |      |  |  |      |  |  |  |      |               |                               |  |  |  |  |  |  |  |  |  |                         |  |  |  |  |  |  |  |  |  |                |    |      |     |    |      |     |  |      |              |                   |    |      |      |    |      |      |  |      |              |                      |     |  |  |     |  |  |  |      |               |                                                              |  |  |  |  |  |  |  |  |  |                           |  |  |  |  |  |  |  |  |  |                    |     |      |      |     |      |      |  |       |                |                      |     |  |  |     |  |  |  |       |                |                               |  |  |  |  |  |  |  |  |  |                                                              |  |  |  |  |  |  |  |  |  |                                                                             |  |  |  |  |  |  |  |  |  |
| <b>Follow-up &lt;6m</b>                                                     |                                                                                                                                                                                                                                                                                                                                                                                                                                                                                                                                                                                                                                                                                                                                                                                                                                                                                                                                                                                                                                                                                                                                                                                                                                                                                                                                                                                                                                                                                                                                                                                                                                                                                                                                                                                                                                                                                                                                                                                                                                                                                                                                    |       |                       |                  |      |                  |                                 |       |                                 |     |        |                                     |  |  |  |  |  |  |  |  |  |                |    |      |     |    |      |     |  |      |               |                      |      |  |  |      |  |  |  |      |               |                               |  |  |  |  |  |  |  |  |  |                         |  |  |  |  |  |  |  |  |  |                |    |      |     |    |      |     |  |      |              |                   |    |      |      |    |      |      |  |      |              |                      |     |  |  |     |  |  |  |      |               |                                                              |  |  |  |  |  |  |  |  |  |                           |  |  |  |  |  |  |  |  |  |                    |     |      |      |     |      |      |  |       |                |                      |     |  |  |     |  |  |  |       |                |                               |  |  |  |  |  |  |  |  |  |                                                              |  |  |  |  |  |  |  |  |  |                                                                             |  |  |  |  |  |  |  |  |  |
| Jaarsma (2000)                                                              | 58                                                                                                                                                                                                                                                                                                                                                                                                                                                                                                                                                                                                                                                                                                                                                                                                                                                                                                                                                                                                                                                                                                                                                                                                                                                                                                                                                                                                                                                                                                                                                                                                                                                                                                                                                                                                                                                                                                                                                                                                                                                                                                                                 | 12.2  | 3.1                   | 74               | 10.6 | 3.2              |                                 | 0.50  | [0.15; 0.85]                    |     |        |                                     |  |  |  |  |  |  |  |  |  |                |    |      |     |    |      |     |  |      |               |                      |      |  |  |      |  |  |  |      |               |                               |  |  |  |  |  |  |  |  |  |                         |  |  |  |  |  |  |  |  |  |                |    |      |     |    |      |     |  |      |              |                   |    |      |      |    |      |      |  |      |              |                      |     |  |  |     |  |  |  |      |               |                                                              |  |  |  |  |  |  |  |  |  |                           |  |  |  |  |  |  |  |  |  |                    |     |      |      |     |      |      |  |       |                |                      |     |  |  |     |  |  |  |       |                |                               |  |  |  |  |  |  |  |  |  |                                                              |  |  |  |  |  |  |  |  |  |                                                                             |  |  |  |  |  |  |  |  |  |
| Zamanzadeh (2013)                                                           | 38                                                                                                                                                                                                                                                                                                                                                                                                                                                                                                                                                                                                                                                                                                                                                                                                                                                                                                                                                                                                                                                                                                                                                                                                                                                                                                                                                                                                                                                                                                                                                                                                                                                                                                                                                                                                                                                                                                                                                                                                                                                                                                                                 | 66.5  | 15.3                  | 40               | 30.3 | 17.6             |                                 | 2.17  | [1.60; 2.73]                    |     |        |                                     |  |  |  |  |  |  |  |  |  |                |    |      |     |    |      |     |  |      |               |                      |      |  |  |      |  |  |  |      |               |                               |  |  |  |  |  |  |  |  |  |                         |  |  |  |  |  |  |  |  |  |                |    |      |     |    |      |     |  |      |              |                   |    |      |      |    |      |      |  |      |              |                      |     |  |  |     |  |  |  |      |               |                                                              |  |  |  |  |  |  |  |  |  |                           |  |  |  |  |  |  |  |  |  |                    |     |      |      |     |      |      |  |       |                |                      |     |  |  |     |  |  |  |       |                |                               |  |  |  |  |  |  |  |  |  |                                                              |  |  |  |  |  |  |  |  |  |                                                                             |  |  |  |  |  |  |  |  |  |
| Random effects model                                                        | 307                                                                                                                                                                                                                                                                                                                                                                                                                                                                                                                                                                                                                                                                                                                                                                                                                                                                                                                                                                                                                                                                                                                                                                                                                                                                                                                                                                                                                                                                                                                                                                                                                                                                                                                                                                                                                                                                                                                                                                                                                                                                                                                                |       |                       | 327              |      |                  |                                 | 1.32  | [-0.31; 2.95]                   |     |        |                                     |  |  |  |  |  |  |  |  |  |                |    |      |     |    |      |     |  |      |               |                      |      |  |  |      |  |  |  |      |               |                               |  |  |  |  |  |  |  |  |  |                         |  |  |  |  |  |  |  |  |  |                |    |      |     |    |      |     |  |      |              |                   |    |      |      |    |      |      |  |      |              |                      |     |  |  |     |  |  |  |      |               |                                                              |  |  |  |  |  |  |  |  |  |                           |  |  |  |  |  |  |  |  |  |                    |     |      |      |     |      |      |  |       |                |                      |     |  |  |     |  |  |  |       |                |                               |  |  |  |  |  |  |  |  |  |                                                              |  |  |  |  |  |  |  |  |  |                                                                             |  |  |  |  |  |  |  |  |  |
| Heterogeneity: $I^2 = 96\%$ , $\tau^2 = 1.3297$ , $p < 0.01$                |                                                                                                                                                                                                                                                                                                                                                                                                                                                                                                                                                                                                                                                                                                                                                                                                                                                                                                                                                                                                                                                                                                                                                                                                                                                                                                                                                                                                                                                                                                                                                                                                                                                                                                                                                                                                                                                                                                                                                                                                                                                                                                                                    |       |                       |                  |      |                  |                                 |       |                                 |     |        |                                     |  |  |  |  |  |  |  |  |  |                |    |      |     |    |      |     |  |      |               |                      |      |  |  |      |  |  |  |      |               |                               |  |  |  |  |  |  |  |  |  |                         |  |  |  |  |  |  |  |  |  |                |    |      |     |    |      |     |  |      |              |                   |    |      |      |    |      |      |  |      |              |                      |     |  |  |     |  |  |  |      |               |                                                              |  |  |  |  |  |  |  |  |  |                           |  |  |  |  |  |  |  |  |  |                    |     |      |      |     |      |      |  |       |                |                      |     |  |  |     |  |  |  |       |                |                               |  |  |  |  |  |  |  |  |  |                                                              |  |  |  |  |  |  |  |  |  |                                                                             |  |  |  |  |  |  |  |  |  |
| <b>Follow-up =&gt;12m</b>                                                   |                                                                                                                                                                                                                                                                                                                                                                                                                                                                                                                                                                                                                                                                                                                                                                                                                                                                                                                                                                                                                                                                                                                                                                                                                                                                                                                                                                                                                                                                                                                                                                                                                                                                                                                                                                                                                                                                                                                                                                                                                                                                                                                                    |       |                       |                  |      |                  |                                 |       |                                 |     |        |                                     |  |  |  |  |  |  |  |  |  |                |    |      |     |    |      |     |  |      |               |                      |      |  |  |      |  |  |  |      |               |                               |  |  |  |  |  |  |  |  |  |                         |  |  |  |  |  |  |  |  |  |                |    |      |     |    |      |     |  |      |              |                   |    |      |      |    |      |      |  |      |              |                      |     |  |  |     |  |  |  |      |               |                                                              |  |  |  |  |  |  |  |  |  |                           |  |  |  |  |  |  |  |  |  |                    |     |      |      |     |      |      |  |       |                |                      |     |  |  |     |  |  |  |       |                |                               |  |  |  |  |  |  |  |  |  |                                                              |  |  |  |  |  |  |  |  |  |                                                                             |  |  |  |  |  |  |  |  |  |
| De la Porte (2007)                                                          | 118                                                                                                                                                                                                                                                                                                                                                                                                                                                                                                                                                                                                                                                                                                                                                                                                                                                                                                                                                                                                                                                                                                                                                                                                                                                                                                                                                                                                                                                                                                                                                                                                                                                                                                                                                                                                                                                                                                                                                                                                                                                                                                                                | 23.8  | 14.9                  | 122              | 30.2 | 14.9             |                                 | -0.43 | [-0.68; -0.17]                  |     |        |                                     |  |  |  |  |  |  |  |  |  |                |    |      |     |    |      |     |  |      |               |                      |      |  |  |      |  |  |  |      |               |                               |  |  |  |  |  |  |  |  |  |                         |  |  |  |  |  |  |  |  |  |                |    |      |     |    |      |     |  |      |              |                   |    |      |      |    |      |      |  |      |              |                      |     |  |  |     |  |  |  |      |               |                                                              |  |  |  |  |  |  |  |  |  |                           |  |  |  |  |  |  |  |  |  |                    |     |      |      |     |      |      |  |       |                |                      |     |  |  |     |  |  |  |       |                |                               |  |  |  |  |  |  |  |  |  |                                                              |  |  |  |  |  |  |  |  |  |                                                                             |  |  |  |  |  |  |  |  |  |
| Random effects model                                                        | 953                                                                                                                                                                                                                                                                                                                                                                                                                                                                                                                                                                                                                                                                                                                                                                                                                                                                                                                                                                                                                                                                                                                                                                                                                                                                                                                                                                                                                                                                                                                                                                                                                                                                                                                                                                                                                                                                                                                                                                                                                                                                                                                                |       |                       | 936              |      |                  |                                 | -0.43 | [-0.68; -0.17]                  |     |        |                                     |  |  |  |  |  |  |  |  |  |                |    |      |     |    |      |     |  |      |               |                      |      |  |  |      |  |  |  |      |               |                               |  |  |  |  |  |  |  |  |  |                         |  |  |  |  |  |  |  |  |  |                |    |      |     |    |      |     |  |      |              |                   |    |      |      |    |      |      |  |      |              |                      |     |  |  |     |  |  |  |      |               |                                                              |  |  |  |  |  |  |  |  |  |                           |  |  |  |  |  |  |  |  |  |                    |     |      |      |     |      |      |  |       |                |                      |     |  |  |     |  |  |  |       |                |                               |  |  |  |  |  |  |  |  |  |                                                              |  |  |  |  |  |  |  |  |  |                                                                             |  |  |  |  |  |  |  |  |  |
| Heterogeneity: not applicable                                               |                                                                                                                                                                                                                                                                                                                                                                                                                                                                                                                                                                                                                                                                                                                                                                                                                                                                                                                                                                                                                                                                                                                                                                                                                                                                                                                                                                                                                                                                                                                                                                                                                                                                                                                                                                                                                                                                                                                                                                                                                                                                                                                                    |       |                       |                  |      |                  |                                 |       |                                 |     |        |                                     |  |  |  |  |  |  |  |  |  |                |    |      |     |    |      |     |  |      |               |                      |      |  |  |      |  |  |  |      |               |                               |  |  |  |  |  |  |  |  |  |                         |  |  |  |  |  |  |  |  |  |                |    |      |     |    |      |     |  |      |              |                   |    |      |      |    |      |      |  |      |              |                      |     |  |  |     |  |  |  |      |               |                                                              |  |  |  |  |  |  |  |  |  |                           |  |  |  |  |  |  |  |  |  |                    |     |      |      |     |      |      |  |       |                |                      |     |  |  |     |  |  |  |       |                |                               |  |  |  |  |  |  |  |  |  |                                                              |  |  |  |  |  |  |  |  |  |                                                                             |  |  |  |  |  |  |  |  |  |
| Heterogeneity: $I^2 = 96\%$ , $\tau^2 = 1.1441$ , $p < 0.01$                |                                                                                                                                                                                                                                                                                                                                                                                                                                                                                                                                                                                                                                                                                                                                                                                                                                                                                                                                                                                                                                                                                                                                                                                                                                                                                                                                                                                                                                                                                                                                                                                                                                                                                                                                                                                                                                                                                                                                                                                                                                                                                                                                    |       |                       |                  |      |                  |                                 |       |                                 |     |        |                                     |  |  |  |  |  |  |  |  |  |                |    |      |     |    |      |     |  |      |               |                      |      |  |  |      |  |  |  |      |               |                               |  |  |  |  |  |  |  |  |  |                         |  |  |  |  |  |  |  |  |  |                |    |      |     |    |      |     |  |      |              |                   |    |      |      |    |      |      |  |      |              |                      |     |  |  |     |  |  |  |      |               |                                                              |  |  |  |  |  |  |  |  |  |                           |  |  |  |  |  |  |  |  |  |                    |     |      |      |     |      |      |  |       |                |                      |     |  |  |     |  |  |  |       |                |                               |  |  |  |  |  |  |  |  |  |                                                              |  |  |  |  |  |  |  |  |  |                                                                             |  |  |  |  |  |  |  |  |  |
| Test for subgroup differences: $\chi^2_2 = 14.33$ , $df = 2$ ( $p < 0.01$ ) |                                                                                                                                                                                                                                                                                                                                                                                                                                                                                                                                                                                                                                                                                                                                                                                                                                                                                                                                                                                                                                                                                                                                                                                                                                                                                                                                                                                                                                                                                                                                                                                                                                                                                                                                                                                                                                                                                                                                                                                                                                                                                                                                    |       |                       |                  |      |                  |                                 |       |                                 |     |        |                                     |  |  |  |  |  |  |  |  |  |                |    |      |     |    |      |     |  |      |               |                      |      |  |  |      |  |  |  |      |               |                               |  |  |  |  |  |  |  |  |  |                         |  |  |  |  |  |  |  |  |  |                |    |      |     |    |      |     |  |      |              |                   |    |      |      |    |      |      |  |      |              |                      |     |  |  |     |  |  |  |      |               |                                                              |  |  |  |  |  |  |  |  |  |                           |  |  |  |  |  |  |  |  |  |                    |     |      |      |     |      |      |  |       |                |                      |     |  |  |     |  |  |  |       |                |                               |  |  |  |  |  |  |  |  |  |                                                              |  |  |  |  |  |  |  |  |  |                                                                             |  |  |  |  |  |  |  |  |  |

# Type of nurse-led case management delivered subgroup analysis

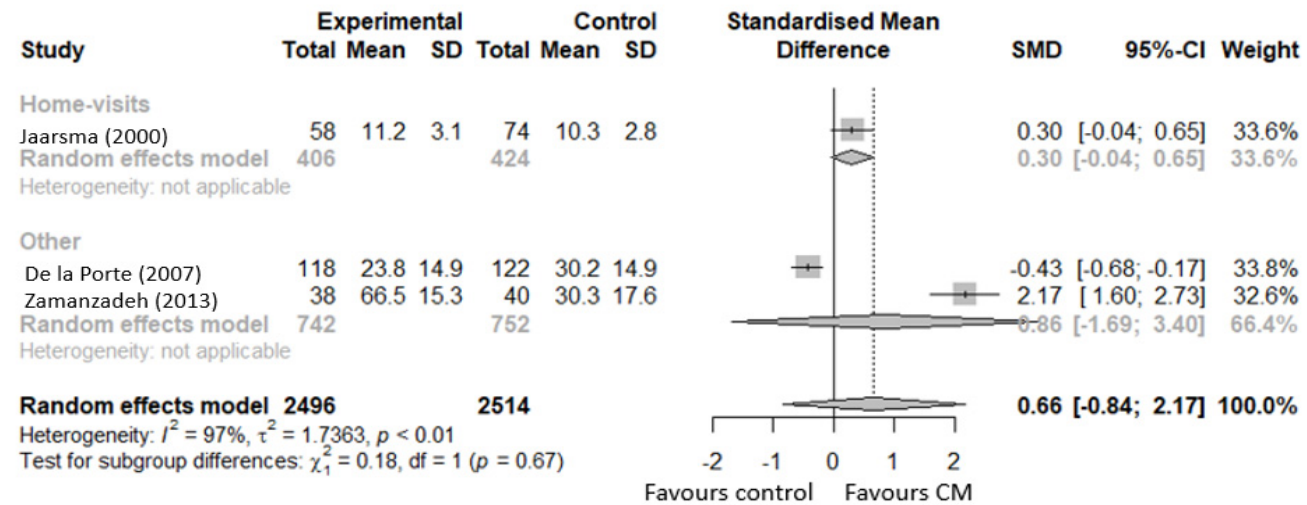

# Age subgroup analysis

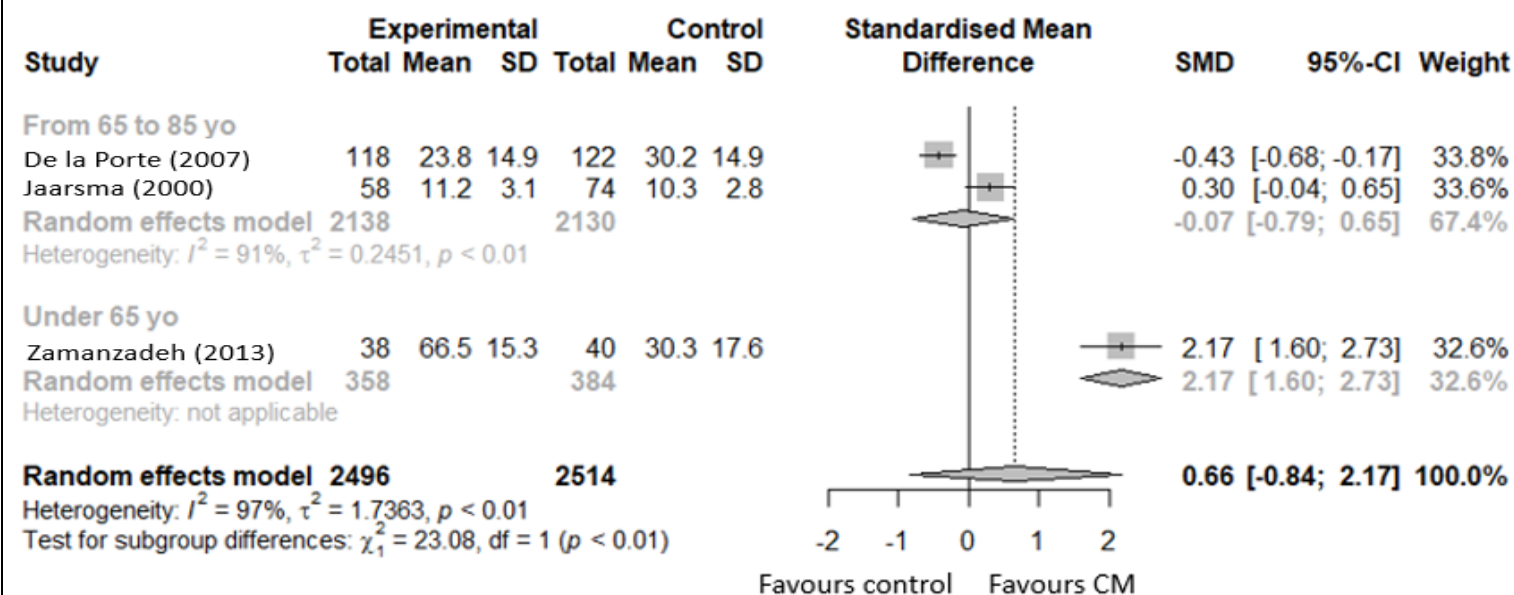

**Table S5. Descriptive tables of studies with incomplete outcome data.**

| Hospitalizations for heart failure |                      |                                |               |                                     |                                      |
|------------------------------------|----------------------|--------------------------------|---------------|-------------------------------------|--------------------------------------|
| Author, year                       | Case management (CM) | Number of subjects in CM group | Control group | Number of subjects in control group | Type of outcome reported             |
| De la Porte, 2015                  | 23                   | 118                            | 47            | 122                                 | Hospitalisations for HF and or death |
| Delaney, 2010                      | 2                    | 12                             | 3             | 12                                  | Number of events                     |
| Golberg, 2003                      | 0.08                 | 138                            | 0.11          | 142                                 | Average utilization                  |
| McDonald, 2001                     | 0                    | 35                             | 0             | 35                                  | Number of events                     |
| Fonarow, 1997                      | 34                   | 179                            | 344           | 179                                 | Number of events                     |

| All-cause hospitalizations |                                      |                                |               |                                     |                                   |
|----------------------------|--------------------------------------|--------------------------------|---------------|-------------------------------------|-----------------------------------|
| Author, year               | Case management (Standard deviation) | Number of subjects in CM group | Control group | Number of subjects in control group | Type of outcome reported          |
| Brannstrom, 2014           | 15                                   | 36                             | 53            | 36                                  | Number of events                  |
| Holst, 2001                | 0.08 (0.28)                          | NI                             | 1.05 (0.98)   | NI                                  | Average utilization               |
| Vavouranakis, 2003         | 2.14 (NI)                            | 33                             | 1.25          | 28                                  | Average utilization               |
| Ekman, 1998                | 1.1 (1.3)                            | 79                             | 1.2 (1.5)     | 79                                  | Average utilization               |
| ONG, 2016                  | 248                                  | NI                             | 223           | NI                                  | Number of events                  |
| Schellinger, 2011          | 34.9%                                | 63                             | 31.5%         | 715                                 | Percentage of readmitted subjects |
| Shah, 1998                 | 0.5 (NI)                             | 17                             | 1.2 (NI)      | 17                                  | Average utilization               |

**CM:** Case management

| Quality of life    |               |                                      |                                    |
|--------------------|---------------|--------------------------------------|------------------------------------|
| Author, year       | Questionnaire | Case Management (standard deviation) | Control group (standard deviation) |
| Aiken, 2006        | SF-36         | 0.16 (NI)                            | -0,17 (NI)                         |
| Delaney, 2010      | MLHF          | 42.5 (17.9)                          | 58.0 (17)                          |
| Holst, 2001        | MLHF          | 32 (NI)                              | 53 (NI)                            |
| Vavouranakis, 2003 | MLHF          | 2.68 (0.034)                         | 2.33 (0.032)                       |

**SF-36:** Short Form-36 Health Survey **MLHF:** Minnesota living with heart failure
